1                   A cancer cell-intrinsic GOT2-PPAR $\delta$  axis suppresses antitumor immunity

2

3   Hannah Sanford-Crane<sup>1,\*</sup>, Jaime Abrego<sup>1,\*</sup>, Chet Oon<sup>1</sup>, Xu Xiao<sup>2</sup>, Shanthi Nagarajan<sup>3,4</sup>, Sohinee

4   Bhattacharyya<sup>1</sup>, Peter Tontonoz<sup>2</sup>, Mara H. Sherman<sup>1,5,#</sup>

5

6   <sup>1</sup>Department of Cell, Developmental & Cancer Biology, Oregon Health & Science University,

7   Portland, OR, USA

8   <sup>2</sup>Department of Pathology and Laboratory Medicine, David Geffen School of Medicine,

9   University of California, Los Angeles, CA, USA

10   <sup>3</sup>Medicinal Chemistry Core, Oregon Health & Science University, Portland, OR, USA

11   <sup>4</sup>Present affiliation: Discovery Chemistry and Research Technologies, Lilly Research

12   Laboratories, Eli Lilly and Company, Lilly Corporate Center, Indianapolis, IN, USA

13   <sup>5</sup>Knight Cancer Institute, Oregon Health & Science University, Portland, OR, USA

14   \*These authors contributed equally

15   #Corresponding author (email: [shermama@ohsu.edu](mailto:shermama@ohsu.edu))

16

17

18

19

20

21

22

23

24 **Abstract**

25 **Despite significant recent advances in precision medicine<sup>1,2</sup>, pancreatic ductal**  
26 **adenocarcinoma (PDAC) remains near-uniformly lethal. While the most frequent genomic**  
27 **alterations in PDAC are not presently druggable<sup>3</sup> and conventional therapies are often**  
28 **ineffective in this disease<sup>4</sup>, immune-modulatory therapies hold promise to meaningfully**  
29 **improve outcomes for PDAC patients. Development of such therapies requires an improved**  
30 **understanding of the immune evasion mechanisms that characterize the PDAC**  
31 **microenvironment, including frequent exclusion of antineoplastic T cells and abundance of**  
32 **immune-suppressive myeloid cells<sup>5-9</sup>. Here we show that cancer cell-intrinsic glutamic-**  
33 **oxaloacetic transaminase 2 (GOT2) shapes the immune microenvironment to suppress**  
34 **antitumor immunity. Mechanistically, we find that GOT2 functions beyond its established**  
35 **role in the malate-aspartate shuttle<sup>10-13</sup> and promotes the transcriptional activity of nuclear**  
36 **receptor peroxisome proliferator-activated receptor delta (PPAR $\delta$ ), facilitated by direct**  
37 **fatty acid binding. While GOT2 in PDAC cells is dispensable for cancer cell proliferation *in***  
38  ***vivo*, GOT2 loss results in T cell-dependent suppression of tumor growth, and genetic or**  
39 **pharmacologic activation of PPAR $\delta$  restores PDAC progression in the GOT2-null context.**  
40 **This cancer cell-intrinsic GOT2-PPAR $\delta$  axis promotes spatial restriction of both CD4<sup>+</sup> and**  
41 **CD8<sup>+</sup> T cells from the tumor microenvironment, and fosters the immune-suppressive**  
42 **phenotype of tumor-infiltrating myeloid cells. Our results demonstrate a non-canonical**  
43 **function for an established mitochondrial enzyme in transcriptional regulation of immune**  
44 **evasion, which may be exploitable to promote a productive antitumor immune response.**

45

46

47 **Main**

48 Dual functions for GOT2 are described in the literature. The far better studied function is as a  
49 mitochondrial transaminase, implicated in maintenance of the malate-aspartate shuttle and redox  
50 homeostasis<sup>10-13</sup>. However, a limited body of evidence suggests a role for GOT2 in fatty acid  
51 binding and trafficking<sup>14-19</sup>, though this role remains poorly understood and has not been  
52 investigated in cancer. In these studies, GOT2 is often referred to as plasma membrane fatty acid  
53 binding protein (FABPpm) due to its membrane-proximal localization in hepatocytes and the  
54 ability of GOT2/FABPpm antiserum to disrupt fatty acid trafficking in metabolic cell types  
55 including hepatocytes and cardiomyocytes<sup>14,20-22</sup>. In light of recent work from our group and others  
56 documenting the importance of fatty acid trafficking for solid tumor progression<sup>23-27</sup>, we  
57 considered that GOT2 may promote PDAC growth, at least in part through its fatty acid trafficking  
58 function. GOT2 is overexpressed in human PDAC<sup>28</sup>, and while transmembrane fatty acid  
59 transporters were variably expressed, GOT2 was consistently expressed in human PDAC per two  
60 independent RNA-seq datasets (Extended Data Fig. 1a, 1b). We set out to determine whether  
61 GOT2 plays a role in PDAC progression *in vivo* and, if so, to understand the relevance of its  
62 established mitochondrial role versus its less characterized role in spatial regulation of fatty acids.  
63

64 To assess the significance of GOT2 for PDAC progression, we generated several loss-of-function  
65 systems, using shRNA or CRISPR/Cas9 and using human and murine PDAC cells (Extended Data  
66 Fig. 2a). Cas9 and sgRNAs were introduced by transient transfection, and Cas9 was no longer  
67 expressed by the time cells were used for *in vivo* studies. Across all cell lines tested, only 2 showed  
68 proliferation defects (Fig. 1a, Extended Data Fig. 2b). These defects were modest and, in 1 of the  
69 2 lines, a significant reduction in proliferation was only seen upon inducible GOT2 knockdown,

70 suggesting that PDAC cells have sufficient metabolic plasticity to adapt to GOT2 loss and maintain  
71 proliferative capacity. However, when sgGot2 PDAC cells were transplanted into pancreata of  
72 immune-competent hosts, tumor growth was severely compromised (Fig. 1b). Consistent with *in*  
73 *vitro* results, proliferation among tumor cells was not impaired *in vivo* (Fig. 1c). An independent  
74 model also revealed a critical role for GOT2 in PDAC growth, whether GOT2 was knocked down  
75 with shRNA (Fig. 1d) or knocked out with CRISPR/Cas9 (Fig. 1e). Though shRNA-mediated  
76 knockdown had a less dramatic effect on tumor growth, we noted a partial recovery of GOT2  
77 expression in these tumors by experimental endpoint (Extended Data Fig. 2c). These results  
78 suggested that GOT2 is dispensable for PDAC cell proliferation but required for tumor growth *in*  
79 *vivo*, and raised the possibility that cancer cell-intrinsic GOT2 promotes growth-permissive  
80 regulation of the tumor microenvironment.

81

82 To gain insight into GOT2 function in an intact tumor microenvironment, we identified  
83 transcriptional programs with expression inversely correlated with *GOT2* transcript abundance in  
84 The Cancer Genome Atlas (TCGA) RNA-seq data (Fig. 2a). Pathway analysis of this group of  
85 genes revealed significant enrichment for genes associated with lymphocyte differentiation,  
86 activation, and adhesion, and led us to question whether cancer cell-intrinsic GOT2 regulates the  
87 abundance and/or activity of intratumoral T cells. We quantified T cells in 2 independent GOT2  
88 loss-of-function models and found that T cell frequencies were significantly increased in sgGot2  
89 or shGot2 tumors compared to controls, including CD4<sup>+</sup> and CD8<sup>+</sup> T cells (Fig. 2b-2d). As PDAC  
90 contains high numbers of immune-suppressive myeloid cells, including abundant macrophages,  
91 which contribute to T cell exclusion<sup>29-31</sup>, we assessed macrophage abundance and phenotype in  
92 these tumor tissues. We found that loss of GOT2 in cancer cells increased total macrophage

93 abundance while decreasing the frequency of Arg1<sup>+</sup> macrophages out of total macrophages (Fig.  
94 2e), consistent with macrophage polarization to a less immune-suppressive phenotype permissive  
95 to T cell recruitment. The frequency of GRZB<sup>+</sup> CD8<sup>+</sup> cells was also increased in the sgGot2 setting  
96 (Fig. 2f, Extended Data Fig. 2d). To address whether the differences in T cell abundance were  
97 secondary to differences in tumor size, we performed a time course and harvested tumors soon  
98 after transplantation to quantify intratumoral T cells. At 11 days post-transplantation, a time point  
99 when tumors are small in control and sgGot2 tumors and not yet different in size, T cell frequencies  
100 are already significantly higher in the GOT2-null setting (Fig. 2g); T cell frequency was also  
101 significantly increased at days 19 and 27 post-transplantation, though tumors are significantly  
102 different in size by these early time points. We next asked whether these T cells were in fact  
103 functional in suppressing tumor progression. To address this, we treated control and sgGot2 tumors  
104 with neutralizing antibodies against CD4<sup>+</sup> and CD8<sup>+</sup> T cells. This intervention had no impact on  
105 growth of control tumors, consistent with previous studies documenting a lack of T cell-mediated  
106 antitumor immunity in mouse models of PDAC<sup>32</sup>. However, growth of sgGot2 tumors was restored  
107 upon T cell neutralization (Fig. 2h), suggesting that GOT2 promotes PDAC progression at least in  
108 part by suppressing T cell-dependent antitumor immunity.

109

110 We next addressed the mechanism by which cancer cell-intrinsic GOT2 influences the immune  
111 microenvironment, taking potential enzymatic and fatty acid-binding functions into account. To  
112 begin to address this, we examined GOT2 localization in PDAC cells and found that a pool of this  
113 canonically mitochondrial protein localizes to the nucleus in murine pre-malignant lesions and  
114 PDAC as well as human PDAC *in vivo* (Fig. 3a, 3b, Extended Data Fig. 3a). We note that, while  
115 all human PDAC specimens examined showed evidence of nuclear GOT2 in pan-cytokeratin<sup>+</sup>

116 tumor cells, tumor cells with GOT2 restricted to mitochondrial and membrane-proximal regions  
117 and without nuclear GOT2 were also observed across these samples. This nuclear GOT2 pool was  
118 also evident *in vitro*, whether we analyzed endogenous or exogenous, His-tagged GOT2 (Extended  
119 Data Fig. 3b-e). We reasoned that the intact proliferation of GOT2-null tumors suggested the  
120 presence of metabolic adaptation mechanisms to retain redox balance, and motivated us to consider  
121 non-canonical functions of GOT2 related to its putative fatty acid binding capacity. The previously  
122 unappreciated nuclear pool of GOT2 led us to hypothesize that GOT2 regulates nuclear trafficking  
123 of fatty acids, either into or within the nucleus. Nuclear fatty acid trafficking has been shown to be  
124 regulated by fatty acid binding proteins<sup>33,34</sup>, and nuclear fatty acids have established functional  
125 significance as ligands for the peroxisome proliferator-activated receptor (PPAR) members of the  
126 nuclear receptor superfamily of transcription factors<sup>35</sup>. This 3-member family is activated by fatty  
127 acid ligands, and while PPAR $\alpha$  and PPAR $\gamma$  display tissue-restricted expression, PPAR $\delta$  is  
128 ubiquitously expressed, and was expressed in all PDAC lines examined, whether or not GOT2 was  
129 inhibited (Extended Data Fig. 4a). Importantly, PPAR $\delta$  promotes tumorigenesis via tissue-specific  
130 metabolic and immune-modulatory mechanisms<sup>36-39</sup>, prompting us to test a functional relationship  
131 between GOT2 and PPAR $\delta$  that may underlie the phenotypes of GOT2-null PDAC.

132  
133 Transcriptional activity from a PPAR response element (PPRE) was reduced in GOT2-null PDAC  
134 cells (Fig. 3c), suggesting that GOT2 positively regulates PPAR $\delta$  activity. Unlike steroid-activated  
135 nuclear receptors, which are sequestered in the cytoplasm in the absence of ligand and translocate  
136 to the nucleus upon ligand engagement, PPAR $\delta$  is constitutively nuclear and bound to DNA, but  
137 undergoes a conformational change upon binding of nuclear fatty acids to enable interaction with  
138 coactivator complexes, altered DNA binding, and induction of target gene expression<sup>40</sup>. Further

139 supporting positive regulation of PPAR $\delta$  transcriptional activity by GOT2, nuclear extracts from  
140 control and sgGot2 cells were applied to wells containing immobilized, PPRE-containing DNA,  
141 followed by incubation with a PPAR $\delta$  antibody and a peroxidase-conjugated secondary antibody.  
142 Results of this assay suggested reduced PPAR $\delta$  transcriptional activity in GOT2-null PDAC cells  
143 (Fig. 3d). Chromatin immunoprecipitation (ChIP) PPAR $\delta$  and acetylated histone H3K9, a marker  
144 of active promoters, followed by qPCR also supported a reduction of PPAR $\delta$  transcriptional  
145 activity in the absence of GOT2 (Fig. 3e, 3f). Some of these genes previously linked to PPAR $\delta$   
146 activity appear potentially to be indirect targets. Expression of PPAR $\delta$  target genes was also  
147 reduced in GOT2-null PDAC cells, and synthetic PPAR $\delta$  agonist GW501516 restored target gene  
148 expression, suggesting that these genes are indeed PPAR $\delta$ -regulated (Fig. 3g). Among the genes  
149 with clear relevance to our *in vivo* phenotype was *PTGS2*, which encodes COX-2. Recently  
150 reported gain- and loss-of-function experiments suggest that COX-2 promotes T cell exclusion  
151 from the PDAC microenvironment, consistent with our results, and that *PTGS2* expression  
152 correlated with poor patient survival<sup>41</sup>. We further investigated regulation of COX-2 downstream  
153 of GOT2 and found that COX-2 protein levels were reduced in GOT2-null PDAC cells *in vitro*  
154 and *in vivo* (Extended Data Fig. 4a, 4b). These results together suggest that GOT2 promotes  
155 transcriptional activity of PPAR $\delta$  in PDAC cells.

156

157 As we were prompted to investigate a GOT2-PPAR $\delta$  functional interaction based on the putative  
158 fatty acid binding function of GOT2, we investigated this role further. For this, we analyzed the  
159 crystal structure of human GOT2<sup>42</sup> and identified 5 putative fatty acid binding sites based on  
160 hydrophobicity (Fig. 4a, 4b). We then performed *in silico* docking studies for known fatty acid  
161 ligands for PPAR $\delta$ , and identified a potential interaction between arachidonic acid and GOT2

162 hydrophobic site 2 (Fig. 4c). This modeled interaction yielded a docking score of -7.6 kcal/mol,  
163 which is very similar to the docking score calculated for arachidonic acid in the ligand binding  
164 domain of PPAR $\gamma$  (-7.0 kcal/mol)<sup>43</sup>, an interaction that is known to be direct and functionally  
165 significant. To probe this interaction further, we performed competitive fatty acid binding assays  
166 using purified GOT2 protein and radiolabeled arachidonic acid. In addition to cold arachidonic  
167 acid, we used cold oleic acid as this was previously suggested to bind to GOT2<sup>19</sup> (though our  
168 analysis revealed a distinct fatty acid binding domain than this previous study) as well as  
169 prostaglandin D2 (PGD<sub>2</sub>), a downstream metabolite of arachidonic acid which we predicted to  
170 serve as a negative control and not to bind directly to GOT2 based on computational modeling.  
171 The competitive binding assay showed that arachidonic acid indeed bound to GOT2 directly, and  
172 while cold arachidonic acid readily displaced radiolabeled ligand, our negative control lipid  
173 (PGD<sub>2</sub>) was unable to compete away the arachidonic acid signal even when PGD<sub>2</sub> concentration  
174 exceeded that of arachidonic acid by three orders of magnitude (Fig. 4d), supporting a specific  
175 interaction. Oleic acid had a modest effect on binding, suggesting that oleic acid may bind to the  
176 arachidonic acid-bound site but at a lower affinity, or may bind to a separate site on the protein.  
177 To assess a relationship between GOT2 and arachidonic acid trafficking in cells, we performed  
178 mass spectrometry to measure arachidonic acid in whole cells and nuclei; levels were unchanged  
179 at the whole-cell level between control and sgGot2 cells (Extended Data Fig. 4c), but nuclear levels  
180 were below a reliable level of detection. We developed an assay to measure nuclear arachidonic  
181 acid accumulation by spiking fluorescent arachidonic acid into our culture medium and measuring  
182 fluorescent signal in isolated nuclei, which revealed a significant reduction in nuclear arachidonic  
183 acid accumulation in two GOT2 loss-of-function cell lines (Fig. 4e). Though significant, these  
184 differences were modest, suggesting that GOT2 may regulate arachidonic acid within the nucleus



185 as opposed to predominantly regulating its nuclear import. To address the functional significance  
186 of GOT2 fatty acid binding, we looked closely at the putative fatty acid binding pocket we  
187 identified, and selected 3 key amino acid residues we predicted to be critical for arachidonic acid  
188 binding at that site (Fig. 4f). We mutated these 3 residues on His-tagged GOT2 and used this triple-  
189 mutant GOT2 (tmGOT2) or wild-type GOT2 (wtGOT2) to reconstitute sgGot2 PDAC cells. While  
190 wtGOT2 localized to mitochondria and nuclei, tmGOT2 showed a preferential mitochondrial  
191 localization compared to the wild-type protein (Fig. 4g-4i), raising the possibility that fatty acid  
192 binding at this site promotes GOT2 nuclear trafficking, perhaps via interaction with a chaperone.  
193 After confirming that tmGOT2 retains enzymatic activity (Extended Data Fig. 5a, 5b), we assessed  
194 PPAR $\delta$  activity and found that target gene expression and transcriptional activity were reduced in  
195 cells expressing tmGOT2 compared to wtGOT2 (Fig. 4j, 4k). We next transplanted immune-  
196 competent mice with control, sgGot2, sgGot2 + wtGot2, or sgGot2 + tmGot2 PDAC cells. While  
197 wtGot2 completely rescued tumor growth as expected, tmGot2 only partially rescued tumor  
198 growth (Fig. 4l), suggesting a significant role for this fatty acid binding region in GOT2-mediated  
199 PDAC progression.

200

201 Based on these results, we hypothesized that PPAR $\delta$  activation would restore PDAC growth in the  
202 GOT2-null setting. We treated PDAC cells with GW501516 as we found this to override the  
203 limitation on PPAR $\delta$  activity in sgGot2 cells *in vitro*, and observed no increase (in fact, a decrease)  
204 in proliferation (Fig. 5a). However, GW501516 treatment *in vivo* rescued growth of GOT2-null  
205 PDAC without impacting control tumor growth (Fig. 5b), and restored immune suppression with  
206 respect to intratumoral T cell abundance (Fig. 5c) and induction of COX-2 expression (Fig. 5d,  
207 Extended Data Fig. 4b). As GW501516 acts systemically, we next specifically activated PPAR $\delta$

208 in PDAC cells by introducing a fusion of PPAR $\delta$  with the VP16 transactivation domain from  
209 herpes simplex virus<sup>44</sup>, to enable ligand-independent activation, into control and sgGot2 PDAC  
210 cells (Extended Data Fig. 5c) at sufficiently low copy number to avoid detectable PPAR $\delta$   
211 overexpression. While VP16-PPAR $\delta$  did not increase proliferation *in vitro* (Fig. 5e) nor increase  
212 PDAC growth in the control group, genetic PPAR $\delta$  activation significantly albeit partially rescued  
213 tumor growth in sgGot2 tumors in 2 independent models (Fig. 5f, 5g). Consistent with these  
214 findings, VP16-PPAR $\delta$  increased expression of target genes such as *Ptgs2* in sgGot2 cells (Fig.  
215 5h). Together, these results suggest that GOT2 promotes PDAC progression and immune  
216 suppression by activating PPAR $\delta$ .

217

218 Our study suggests that GOT2 plays a critical role in promoting a tumor-permissive immune  
219 microenvironment in the pancreas. This function is attributable at least in part to direct fatty acid  
220 binding, and activation of nuclear receptor PPAR $\delta$ . Further studies are needed to understand the  
221 mechanisms regulating GOT2 subcellular localization, as well as the precise molecular mechanism  
222 by which GOT2 promotes PPAR $\delta$  transcriptional activity. While diverse mechanisms contribute  
223 to immune evasion in PDAC<sup>45</sup>, targeting GOT2 may be part of a potential treatment approach to  
224 foster an immune response against this deadly cancer.

225

226

## 227 **References**

228

- 229 1 Aguirre, A. J. *et al.* Real-time Genomic Characterization of Advanced Pancreatic Cancer  
230 to Enable Precision Medicine. *Cancer Discov* **8**, 1096-1111, doi:10.1158/2159-8290.CD-  
231 18-0275 (2018).
- 232 2 Tiriach, H. *et al.* Organoid Profiling Identifies Common Responders to Chemotherapy in  
233 Pancreatic Cancer. *Cancer Discov* **8**, 1112-1129, doi:10.1158/2159-8290.CD-18-0349  
234 (2018).

- 235 3 Ying, H. *et al.* Genetics and biology of pancreatic ductal adenocarcinoma. *Genes Dev* **30**,  
236 355-385, doi:10.1101/gad.275776.115 (2016).
- 237 4 Ryan, D. P., Hong, T. S. & Bardeesy, N. Pancreatic adenocarcinoma. *N Engl J Med* **371**,  
238 1039-1049, doi:10.1056/NEJMra1404198 (2014).
- 239 5 Clark, C. E. *et al.* Dynamics of the immune reaction to pancreatic cancer from inception  
240 to invasion. *Cancer Res* **67**, 9518-9527, doi:10.1158/0008-5472.CAN-07-0175 (2007).
- 241 6 Li, J. *et al.* Tumor Cell-Intrinsic Factors Underlie Heterogeneity of Immune Cell  
242 Infiltration and Response to Immunotherapy. *Immunity* **49**, 178-193 e177,  
243 doi:10.1016/j.immuni.2018.06.006 (2018).
- 244 7 Vonderheide, R. H. & Bayne, L. J. Inflammatory networks and immune surveillance of  
245 pancreatic carcinoma. *Curr Opin Immunol* **25**, 200-205, doi:10.1016/j.coi.2013.01.006  
246 (2013).
- 247 8 Balli, D., Rech, A. J., Stanger, B. Z. & Vonderheide, R. H. Immune Cytolytic Activity  
248 Stratifies Molecular Subsets of Human Pancreatic Cancer. *Clin Cancer Res* **23**, 3129-  
249 3138, doi:10.1158/1078-0432.CCR-16-2128 (2017).
- 250 9 Stromnes, I. M., Hulbert, A., Pierce, R. H., Greenberg, P. D. & Hingorani, S. R. T-cell  
251 Localization, Activation, and Clonal Expansion in Human Pancreatic Ductal  
252 Adenocarcinoma. *Cancer Immunol Res* **5**, 978-991, doi:10.1158/2326-6066.CIR-16-0322  
253 (2017).
- 254 10 van Karnebeek, C. D. M. *et al.* Bi-allelic GOT2 Mutations Cause a Treatable Malate-  
255 Aspartate Shuttle-Related Encephalopathy. *Am J Hum Genet* **105**, 534-548,  
256 doi:10.1016/j.ajhg.2019.07.015 (2019).
- 257 11 Yang, H. *et al.* SIRT3-dependent GOT2 acetylation status affects the malate-aspartate  
258 NADH shuttle activity and pancreatic tumor growth. *EMBO J* **34**, 1110-1125,  
259 doi:10.15252/embj.201591041 (2015).
- 260 12 Yang, S. *et al.* Mitochondrial glutamine metabolism via GOT2 supports pancreatic cancer  
261 growth through senescence inhibition. *Cell Death Dis* **9**, 55, doi:10.1038/s41419-017-  
262 0089-1 (2018).
- 263 13 Hollinshead, K. E. R. *et al.* Respiratory Supercomplexes Promote Mitochondrial  
264 Efficiency and Growth in Severely Hypoxic Pancreatic Cancer. *Cell Rep* **33**, 108231,  
265 doi:10.1016/j.celrep.2020.108231 (2020).
- 266 14 Sorrentino, D. *et al.* Oleate uptake by cardiac myocytes is carrier mediated and involves a  
267 40-kD plasma membrane fatty acid binding protein similar to that in liver, adipose tissue,  
268 and gut. *J Clin Invest* **82**, 928-935, doi:10.1172/JCI113700 (1988).
- 269 15 Isola, L. M. *et al.* 3T3 fibroblasts transfected with a cDNA for mitochondrial aspartate  
270 aminotransferase express plasma membrane fatty acid-binding protein and saturable fatty  
271 acid uptake. *Proc Natl Acad Sci U S A* **92**, 9866-9870, doi:10.1073/pnas.92.21.9866  
272 (1995).
- 273 16 Luiken, J. J., Turcotte, L. P. & Bonen, A. Protein-mediated palmitate uptake and  
274 expression of fatty acid transport proteins in heart giant vesicles. *J Lipid Res* **40**, 1007-  
275 1016 (1999).
- 276 17 Chabowski, A. *et al.* The subcellular compartmentation of fatty acid transporters is  
277 regulated differently by insulin and by AICAR. *FEBS Lett* **579**, 2428-2432,  
278 doi:10.1016/j.febslet.2004.11.118 (2005).

- 279 18 Bradbury, M. W. & Berk, P. D. Mitochondrial aspartate aminotransferase: direction of a  
280 single protein with two distinct functions to two subcellular sites does not require  
281 alternative splicing of the mRNA. *Biochem J* **345 Pt 3**, 423-427 (2000).
- 282 19 Bradbury, M. W., Stump, D., Guarnieri, F. & Berk, P. D. Molecular modeling and  
283 functional confirmation of a predicted fatty acid binding site of mitochondrial aspartate  
284 aminotransferase. *J Mol Biol* **412**, 412-422, doi:10.1016/j.jmb.2011.07.034 (2011).
- 285 20 Stremmel, W., Strohmeyer, G., Borchard, F., Kochwa, S. & Berk, P. D. Isolation and  
286 partial characterization of a fatty acid binding protein in rat liver plasma membranes.  
287 *Proc Natl Acad Sci U S A* **82**, 4-8, doi:10.1073/pnas.82.1.4 (1985).
- 288 21 Stump, D. D., Zhou, S. L. & Berk, P. D. Comparison of plasma membrane FABP and  
289 mitochondrial isoform of aspartate aminotransferase from rat liver. *Am J Physiol* **265**,  
290 G894-902, doi:10.1152/ajpgi.1993.265.5.G894 (1993).
- 291 22 Stremmel, W., Strohmeyer, G. & Berk, P. D. Hepatocellular uptake of oleate is energy  
292 dependent, sodium linked, and inhibited by an antibody to a hepatocyte plasma  
293 membrane fatty acid binding protein. *Proc Natl Acad Sci U S A* **83**, 3584-3588,  
294 doi:10.1073/pnas.83.11.3584 (1986).
- 295 23 Auciello, F. R. *et al.* A Stromal Lysolipid-Autotaxin Signaling Axis Promotes Pancreatic  
296 Tumor Progression. *Cancer Discov* **9**, 617-627, doi:10.1158/2159-8290.CD-18-1212  
297 (2019).
- 298 24 Alicea, G. M. *et al.* Changes in Aged Fibroblast Lipid Metabolism Induce Age-  
299 Dependent Melanoma Cell Resistance to Targeted Therapy via the Fatty Acid  
300 Transporter FATP2. *Cancer Discov* **10**, 1282-1295, doi:10.1158/2159-8290.CD-20-0329  
301 (2020).
- 302 25 Zou, Y. *et al.* Polyunsaturated Fatty Acids from Astrocytes Activate PPARgamma  
303 Signaling in Cancer Cells to Promote Brain Metastasis. *Cancer Discov* **9**, 1720-1735,  
304 doi:10.1158/2159-8290.CD-19-0270 (2019).
- 305 26 Zhang, M. *et al.* Adipocyte-Derived Lipids Mediate Melanoma Progression via FATP  
306 Proteins. *Cancer Discov* **8**, 1006-1025, doi:10.1158/2159-8290.CD-17-1371 (2018).
- 307 27 Pascual, G. *et al.* Targeting metastasis-initiating cells through the fatty acid receptor  
308 CD36. *Nature* **541**, 41-45, doi:10.1038/nature20791 (2017).
- 309 28 Chakrabarti, G. *et al.* Targeting glutamine metabolism sensitizes pancreatic cancer to  
310 PARP-driven metabolic catastrophe induced by ss-lapachone. *Cancer Metab* **3**, 12,  
311 doi:10.1186/s40170-015-0137-1 (2015).
- 312 29 Mitchem, J. B. *et al.* Targeting tumor-infiltrating macrophages decreases tumor-initiating  
313 cells, relieves immunosuppression, and improves chemotherapeutic responses. *Cancer*  
314 *Res* **73**, 1128-1141, doi:10.1158/0008-5472.CAN-12-2731 (2013).
- 315 30 Zhu, Y. *et al.* CSF1/CSF1R blockade reprograms tumor-infiltrating macrophages and  
316 improves response to T-cell checkpoint immunotherapy in pancreatic cancer models.  
317 *Cancer Res* **74**, 5057-5069, doi:10.1158/0008-5472.CAN-13-3723 (2014).
- 318 31 Zhang, Y. *et al.* Myeloid cells are required for PD-1/PD-L1 checkpoint activation and the  
319 establishment of an immunosuppressive environment in pancreatic cancer. *Gut* **66**, 124-  
320 136, doi:10.1136/gutjnl-2016-312078 (2017).
- 321 32 Evans, R. A. *et al.* Lack of immunoediting in murine pancreatic cancer reversed with  
322 neoantigen. *JCI Insight* **1**, doi:10.1172/jci.insight.88328 (2016).
- 323 33 Lawrence, J. W., Kroll, D. J. & Eacho, P. I. Ligand-dependent interaction of hepatic fatty  
324 acid-binding protein with the nucleus. *J Lipid Res* **41**, 1390-1401 (2000).

- 325 34 Esteves, A. *et al.* Fatty acid binding proteins have the potential to channel dietary fatty  
326 acids into enterocyte nuclei. *J Lipid Res* **57**, 219-232, doi:10.1194/jlr.M062232 (2016).
- 327 35 Evans, R. M. & Mangelsdorf, D. J. Nuclear Receptors, RXR, and the Big Bang. *Cell* **157**,  
328 255-266, doi:10.1016/j.cell.2014.03.012 (2014).
- 329 36 Yuan, H. *et al.* PPARdelta induces estrogen receptor-positive mammary neoplasia  
330 through an inflammatory and metabolic phenotype linked to mTOR activation. *Cancer*  
331 *Res* **73**, 4349-4361, doi:10.1158/0008-5472.CAN-13-0322 (2013).
- 332 37 Beyaz, S. *et al.* High-fat diet enhances stemness and tumorigenicity of intestinal  
333 progenitors. *Nature* **531**, 53-58, doi:10.1038/nature17173 (2016).
- 334 38 Wang, D. *et al.* Peroxisome proliferator-activated receptor delta promotes colonic  
335 inflammation and tumor growth. *Proc Natl Acad Sci U S A* **111**, 7084-7089,  
336 doi:10.1073/pnas.1324233111 (2014).
- 337 39 Pollock, C. B. *et al.* Induction of metastatic gastric cancer by peroxisome proliferator-  
338 activated receptordelta activation. *PPAR Res* **2010**, 571783, doi:10.1155/2010/571783  
339 (2010).
- 340 40 Adhikary, T. *et al.* Genomewide analyses define different modes of transcriptional  
341 regulation by peroxisome proliferator-activated receptor-beta/delta (PPARbeta/delta).  
342 *PLoS One* **6**, e16344, doi:10.1371/journal.pone.0016344 (2011).
- 343 41 Markosyan, N. *et al.* Tumor cell-intrinsic EPHA2 suppresses anti-tumor immunity by  
344 regulating PTGS2 (COX-2). *J Clin Invest* **129**, 3594-3609, doi:10.1172/JCI127755  
345 (2019).
- 346 42 Jiang, X., Wang, J., Chang, H. & Zhou, Y. Recombinant expression, purification and  
347 crystallographic studies of the mature form of human mitochondrial aspartate  
348 aminotransferase. *Biosci Trends* **10**, 79-84, doi:10.5582/bst.2015.01150 (2016).
- 349 43 Muralikumar, S., Vetrivel, U., Narayanasamy, A. & U, N. D. Probing the intermolecular  
350 interactions of PPARgamma-LBD with polyunsaturated fatty acids and their anti-  
351 inflammatory metabolites to infer most potential binding moieties. *Lipids Health Dis* **16**,  
352 17, doi:10.1186/s12944-016-0404-3 (2017).
- 353 44 Narkar, V. A. *et al.* AMPK and PPARdelta agonists are exercise mimetics. *Cell* **134**, 405-  
354 415, doi:10.1016/j.cell.2008.06.051 (2008).
- 355 45 Zhang, Y., Crawford, H. C. & Pasca di Magliano, M. Epithelial-Stromal Interactions in  
356 Pancreatic Cancer. *Annu Rev Physiol* **81**, 211-233, doi:10.1146/annurev-physiol-020518-  
357 114515 (2019).
- 358

## 359 **Methods**

### 360 **Animals**

361 All experiments were reviewed and overseen by the institutional animal use and care committee  
362 at Oregon Health and Science University in accordance with NIH guidelines for the humane  
363 treatment of animals. C57BL/6J (000664, for models with FC1245<sup>1</sup>) or B6129SF1/J (101043, for  
364 models with 688M<sup>2</sup>) mice from Jackson Laboratory were used for orthotopic transplant

365 experiments at 8-10 weeks of age. Tissues from 6- or 12-month-old *Kras<sup>LSL-G12D/+</sup>;Pdx1-Cre* (KC)  
366 mice were kindly provided by Dr. Ellen Langer (OHSU).

367

### 368 **Human tissue samples**

369 Human patient PDAC tissue samples donated to the Oregon Pancreas Tissue Registry program  
370 (OPTR) in accordance with full ethical approval were kindly shared by Dr. Jason Link and Dr.  
371 Rosalie Sears (OHSU).

372

### 373 **Plasmids**

374 The pCMX-VP16-PPARD plasmid was kindly provided by Dr. Vihang Narkar (University of  
375 Texas Health Science Center at Houston)<sup>3</sup>. The VP16-PPARD element was cloned into the  
376 lentiviral vector. To construct pLenti VP16 PPARD, the VP16-PPARD element was amplified by  
377 PCR using sense primer 5'-GGGGACAAGTTTGTACA  
378 AAAAAGCAGGCTTAATGGCCCCCCCCGAC-3' and antisense primer 5'-  
379 GGGGACCACTTTGTACAAGAAAGCTGGGTTTTAGTACATGTCCTTGTAGATTTCTG  
380 GAGCAGG-3'. PCR product was inserted into pDONR 221 entry clone using Gateway BP  
381 Clonase II enzyme (Thermo Fisher 12535029). Entry clone VP16 PPARD element was swapped  
382 into expression region of pLenti CMV Puro DEST (Addgene #17452) using LR Clonase II enzyme  
383 (Thermo Fisher 11-791-020) to generate pLenti VP16 PPARD construct. The pCMV3 plasmid  
384 containing C-terminal His-tagged human GOT2 cDNA was purchased from Sino Biological  
385 (HG14463-CH) and cloned into the lentiviral vector pLenti CMV Puro DEST (Addgene #17452)  
386 using the same approach as pLenti-VP16 PPARD. pLenti wtGOT2 PCR product was generated  
387 using sense primer 5'-

388 GGGGACAAGTTTGTACAAAAAAGCAGGCTTAATGGCCCTGCTGCACT-3' and antisense  
389 primer 5'-GGGGACCACTTTGTACAAGAAAGCTGGGTTTTTGTAGTGATGGT  
390 GGTGATGATGGTGG-3'. Triple mutant GOT2 was constructed using Q5 Site-Directed  
391 Mutagenesis Kit (New England E0552S) in two subsequent steps. Two sets of primers were used  
392 to generate three site mutations; primer set 1 for K234A mutation (F:5'-AACAGTGGTG  
393 GCGAAAAGGAATCTC-3'; R:5'- GCTATTTCCCTTCCACTGTTC-3') and primer set 2 for  
394 K296A and R303A mutations (F:5'- GTCTGCGCAGATGCGGATGAAGCCAAAGCGGTAGA  
395 GTC-3'; R:5'- CATAGTGAAGG CTCCTACACGC-3'). pLenti tmGOT2 was then generated  
396 using the same approach and primers as pLenti wtGOT2.

397

#### 398 Cell lines

399 Human pancreatic cancer cell lines MIAPaCa-1, PA-TU-8988T, Panc1, HPAF-II, and Capan-2  
400 were obtained from ATCC and grown in Dulbecco's modified Eagle's medium (DMEM)  
401 containing 10% fetal bovine serum. Non-transformed, TERT-immortalized human pancreatic  
402 ductal epithelial cells were kindly provided by Dr. Rosalie Sears (OHSU)<sup>4</sup>. PA-TU-8988T cells  
403 harboring doxycycline-inducible shGOT2 were kindly provided by Dr. Costas Lyssiotis  
404 (University of Michigan). FC1245 PDAC cells were generated from a primary tumor in *Kras*<sup>LSL-</sup>  
405 *G12D/+;Trp53*<sup>LSL-R172H/+;Pdx1-Cre</sup> mice and were kindly provided by Dr. David Tuveson (Cold  
406 Spring Harbor Laboratory)<sup>1</sup>. 688M PDAC cells were generated from a liver metastasis in *Kras*<sup>LSL-</sup>  
407 *G12D/+;Trp53*<sup>LSL-R172H/+;Pdx1-Cre;Rosa26<sup>LSL-tdTomato/+</sup> mice and were kindly provided by Dr. Monte  
408 Winslow (Stanford University School of Medicine)<sup>2</sup>. Cell lines were routinely tested for  
409 *Mycoplasma* at least monthly (MycoAlert Detection Kit, Lonza).</sup>

410 The pSpCas9(BB)-2A-Puro(PX459) v2.0 plasmid (Addgene #62988) was used to clone  
411 guide sequences targeting Got2 per supplier's protocol; sgRNA A:  
412 GACGCGGGTCCACGCCGGT, sgRNA B: ACGCGGGTCCACGCCGGTG. The 688M or  
413 FC1245 cell line was transfected with control plasmid or plasmid containing either of the sgGot2  
414 sequences and subject to selection with 2 µg/ml puromycin for 4 days. Single-cell clones were  
415 expanded and screened for GOT2 protein expression by Western blot.

416 GOT2 shRNA vectors were purchased in bacterial glycerol stocks from Sigma-Aldrich  
417 Mission shRNA (mouse shRNA A: TRCN0000325948, shRNA B: TRCN00000325946; human  
418 sh24: TRCN0000034824, sh27: TRCN0000034827). Briefly, bacterial cultures were amplified in  
419 ampicillin growth medium from glycerol stocks for use in purification of plasmid DNA.  
420 Subsequently, purified plasmid was transfected to packaging cells HEK293T for production of  
421 lentiviral particles. FC1245 cells were then infected and puromycin selected to generate stable  
422 GOT2 knockdowns, with validation by Western blot. Lentivirus preparation for stable cell line  
423 generation was done with pMD2.G envelope plasmid (Addgene #12259) and psPAX2 packaging  
424 plasmid (Addgene 12260) in 293T-LentiX cells. Briefly, 5 µg pMD2.G, 5 µg psPAX2 and 10 µg  
425 of plasmid DNA (shGOT2 KD, VP16-PPARdelta, wtGOT2, tmGOT2, or scramble Ctrl) were  
426 combined with 600 µl Opti-MEM and 20 µl lipofectamine 2000 for 20 mins at room temp. 10cm  
427 dishes of 293T-LentiX were kept in 0% FBS DMEM and the mixture was added in a dropwise  
428 manner. 12hrs later media was changed to 10% FBS DMEM. At 24hrs after transduction and 48hrs  
429 after transduction, media was collected and filtered through a 0.25 µm filter, aliquoted, and frozen  
430 at -80°C. Lentiviral transduction of human and mouse cell lines: cells were plated to 6-well plates.  
431 10 µg/mL polybrene (EMD Millipore TR-1003-G) was added to 1 mL 10% FBS DMEM and 300  
432 µl of filtered lentivirus media. 24hrs later media was changed to fresh 10% FBS DMEM. 48hrs



433 after initial transduction, cells were treated with 2 µg/mL puromycin (Thermo Fisher A1113803),  
434 or 4 µg/mL puromycin depending on cell line. A control well of non-transduced cells was used as  
435 an indicator for proper selection. Protein knockdown was validated by Western blot.

436

### 437 **Western Blotting**

438 PDAC cells were treated as described in the text, and whole cell lysates were prepared in RIPA  
439 buffer containing protease inhibitor cocktail (Sigma-Aldrich 11836170001). Alternatively, sub-  
440 cellular fractions were prepared using Cell Fractionation Kit #9038 purchased from Cell Signaling  
441 Technology following the manufacturer's instructions. Briefly, cells were collected with scraping,  
442 washed in PBS and pelleted (350 x g 5mins). Cells were resuspended in 500 µl PBS and 100 µl  
443 reserved for whole cell lysis in RIPA buffer + cComplete mini EDTA-free protease inhibitor  
444 cocktail. Remaining cell pellet was centrifuged (500 x g 5 mins), PBS was decanted and 500 µl  
445 CIB + 5 µl Protease Inhibitor and 2.5ul PMSF was added. Solutions were vortexed and stored on  
446 ice for 5 mins. Lysates were centrifuged (500 x g 5mins); supernatant was collected as the cytosolic  
447 fraction. Remaining insoluble pellet was washed with CIB and supernatant decanted. 500 µl MIB  
448 + 5ul Protease Inhibitor and 2.5ul PMSF was then added to the cell pellet. After vortexing 15  
449 seconds, solutions were incubated on ice for 5 mins, and centrifuged (8000 x g 5 mins).  
450 Supernatant was collected as the membrane & organelle fraction. Pellet was then washed in MIB  
451 and supernatant decanted. 250 µl CyNIB + 2.5 µl Protease Inhibitor + 1.25 µl PMSF was then  
452 added to the pellet containing nuclei. Solution was sonicated for 5 sec at 20% power 3x to prepare  
453 nuclear lysate. For western blot, 60 µl 4X LDS loading buffer with 10X reducing agent was added  
454 for every 100 µl of supernatant per fraction. Samples were boiled for 5 mins at 95C and centrifuged  
455 for 3 mins at 15,000 x g. 15 µl of each fraction along with 15 µl of whole cell lysate was loaded

456 for Western blotting. Alternatively, to generate total nuclear and cytosolic fractions, NE-PER  
457 Nuclear and Cytoplasmic Extraction Reagent Kit (Thermo Fisher) was used according to the  
458 manufacturer's protocol. Where indicated, His-tagged GOT2 protein was immunoprecipitated  
459 using the His-tag isolation and pull-down Dynabeads system (Thermo Fisher) using the  
460 manufacturer's protocol. Protein concentration was quantitated using the BCA protein assay kit  
461 (Pierce). Equal amounts of protein were loaded in each lane and separated on a 4-12% Bis-Tris  
462 NuPAGE gel (Invitrogen), then transferred onto a PVDF membrane. Membranes were probed with  
463 primary antibodies and infrared secondary antibodies: GOT2 (Thermo Fisher PA5-77990),  $\beta$ -  
464 Actin (Santa Cruz sc-47778), PPAR $\delta$  (Abcam ab178866), His (R&D Systems MAB050-100),  
465 COX2 (Abcam ab15191), COX IV (Cell Signaling Technology 11967S), AIF (Abcam ab1998),  
466 PMCA1 (Novus Biologicals 5F10), Lamin A/C (Cell Signaling Technology 4777S), Tom20  
467 D8T4N (Cell Signaling Technology 42606S), HSC 70 (Santa Cruz sc-7298), anti-rabbit Alexa  
468 Fluor Plus 680 (Thermo Fisher A32734) and anti-mouse Alexa Flour Plus 800 (Invitrogen  
469 A32730). Protein bands were detected using the Odyssey CLx infrared imaging system (LICOR  
470 Biosciences).

471

## 472 **Immunofluorescence**

473 Cells plated on coverslips were fixed in 10% neutral buffered formalin for 10 minutes at room  
474 temperature, washed three times with PBS, and permeabilized with .1% Triton X-100 for 10 min  
475 at room temperature. When MitoTracker staining was performed, cells plated on coverslips were  
476 stained with 100 nM MitoTracker (Thermo Fisher M22462) at 37°C for 15 minutes prior to  
477 fixation. Following permeabilization, coverslips were blocked for one hour at room temperature  
478 in blocking solution (Aqua block buffer, Abcam ab166952) and then transferred to a carrier

479 solution (Aqua block) containing diluted primary antibodies: GOT2 (Sigma-Aldrich HPA018139),  
480 GOT2 (Thermo Fisher PA5-77990), COX IV (Cell Signaling Technology 11967S), COX2  
481 (Abcam ab15191), His (R&D Systems MAB050-100). Coverslips were incubated with the  
482 primary antibody at 4°C overnight and then washed five times for 5 minutes each in PBS following  
483 which, secondary Alexa-flour conjugated antibodies diluted in the same carrier solution (1:400)  
484 were added to the coverslips for one hour at room temperature. After the secondary antibody  
485 incubation, coverslips were washed five times for five minutes each in PBS and mounted with  
486 Vectashield mounting media containing DAPI (Vector Laboratories H-1500). Images were  
487 captured on a Zeiss LSM 880 laser-scanning inverted confocal microscope in the OHSU Advanced  
488 Light Microscopy Shared Resource, and a 40×/ 1.1 NA water objective or 63x/1.4 NA oil objective  
489 was used to image the samples.

490

### 491 **Immunohistochemistry**

492 Mice were anesthetized and euthanized according to institutional guidelines. Pancreatic tumors  
493 were excised carefully and fixed overnight in 10% phosphate-buffered formalin. Tissue samples  
494 were paraffin embedded and sectioned by the OHSU Histopathology Shared Resource. Human  
495 PDAC tissue sections from formalin-fixed, paraffin-embedded blocks were obtained from the  
496 OPTR. In brief, tissue sections were de-paraffinized and rehydrated through an ethanol series and  
497 ultimately in PBS. Following antigen retrieval, tissue samples were blocked for 1 hour at room  
498 temperature in blocking solution (8% BSA solution) and then transferred to a carrier solution (8%  
499 BSA solution) containing diluted antibodies: GOT2 (Sigma-Aldrich HPA018139), GOT2  
500 (Thermo Fisher PA5-77990), COX IV (Cell Signaling Technology 11967S), COX2 (Abcam  
501 ab15191), CD3 (Abcam ab5690), CD4 D7D2Z (Cell Signaling Technology 25229S), CD8

502 (Abcam ab203035), Granzyme B (Abcam ab4059), F4/80 (Cell Signaling Technology 70076T),  
503 Arginase-1 (Sigma-Aldrich ABS535)). Sections were incubated overnight at 4°C and then washed  
504 five times for 5 minutes each in PBS. For fluorescence imaging, secondary Alexa-flour conjugated  
505 antibodies diluted in the same carrier solution (1:400) were added to the sections for one hour at  
506 room temperature. Sections were then washed five times for five minutes each in PBS and were  
507 mounted with Vectashield mounting media containing DAPI. For DAB chromogen imaging,  
508 sections were stained with primary antibody as described above, then the samples were incubated  
509 in polymeric horseradish peroxidase (HRP) conjugated secondary antibody (Leica PV6121) for  
510 one hour followed by 5 five-minute 1xTBST washes. HRP was detected using DAB chromogen  
511 (3,3'-Diaminobenzidine) solution (BioCare Medical BDB2004) prepared per manufacturer  
512 instructions. Tissues were exposed to chromogen solution until a brown precipitate was detected  
513 produced from oxidized DAB where secondary poly-HRP antibody is located. As soon as DAB  
514 chromogen is detected the tissue-slides were washed in diH<sub>2</sub>O, counterstained in hematoxylin,  
515 dehydrated and cleared for mounting. Stained tissue sections were scanned on a Leica Biosystems  
516 Ariol digital fluorescence scanner or Leica Biosystems Aperio brightfield digital scanner.  
517 Quantification was performed for single stains using QuPath quantitative pathology and bioimage  
518 analysis software v0.2.3. For co-stains (CD8/GRZB and F4/80/ARG1), manual counting was  
519 performed on at least 10 high-powered fields per tumor sample.

520

## 521 **Proliferation assays**

522 PDAC cells were seeded into 96-well plates at  $2 \times 10^3$  cells per well in DMEM containing 10%  
523 FBS. Cells were treated as indicated in the manuscript text with 100 nM GW501516 (Cayman  
524 Chemical 10004272) at the time of cell seeding or 5mg/mL doxycycline (Sigma-Aldrich D9891)

525 48 hours prior to cell seeding. GW501516 and doxycycline treatments were both replenished every  
526 48 hours for extended time points. After 72 hours or at the time points indicated in the manuscript,  
527 cells were lysed with CellTiter-Glo Luminescent Cell Viability Assay reagent (Promega) and  
528 luminescence was read using a GloMax plate reader.

529

### 530 **Chromatin immunoprecipitation**

531 Chromatin immunoprecipitation was performed as described previously<sup>5</sup>. Briefly, PDAC cells  
532 were fixed in 1% formaldehyde, and nuclei were isolated and lysed in buffer containing 1% SDS,  
533 10 mM EDTA, 50 mM Tris-HCl pH 8.0, and protease inhibitors, and sheared with a Diagenode  
534 Bioruptor to chromatin fragment sizes of 200–1000 base pairs. Chromatin was  
535 immunoprecipitated with antibodies to PPAR $\delta$  (Abcam ab178866), or acetylated histone H3K9  
536 (Cell Signaling Technology 9649). PPAR $\delta$  binding or histone acetylation at known PPAR $\delta$  target  
537 gene promoter regions was assessed by ChIP-qPCR and enrichment values were normalized to a  
538 control intergenic region of the genome. The following primer sequences were used: *Pparg* F:  
539 tgatgttgctgcaagggatg, R: agggttctatgctgaaggttct, *Tgfb1* F: ggtgctcgctttgtacaaca, R:  
540 gggttaattcctcccgtga, *Cxcl10* F: gcacccctgagagaatcagc, R: gccaaatttagccagatcca, Intergenic A F:  
541 gacttcttcaccccacatgc, R: acagaggaacagaaatggct, *Ptgs2* F: gggactcctcaggctcag, R:  
542 aagtgggttgagttcctca, *Angptl4* F: tcagcctaccaggagagaa, R: ggaggaaaggcgtacaaat, *Cpt1a* F:  
543 ccaacaaccaaaacaaacca, R: cggcagacctaggacaacat, *Il6* F: gttctctgggaaatcgtgga, R:  
544 tcccaacctccactcaaaac, *Hmgcs2* F: ggccagagaaatgttgagc, R: acctgcaacagcctctttgt, Intergenic B F:  
545 tggctctcttggtcaatca, R: aggacaaaacagcaaccaaca.

546

### 547 **Gene expression analysis by qPCR**

548 The isolated total RNA (1 µg) was reverse-transcribed to produce cDNA using iScript Reverse  
549 Transcription Supermix kit (Bio-Rad). Real-time PCR was performed using SYBR Green  
550 supermix (Bio-Rad). The cDNA sequences for specific gene targets were obtained from the human  
551 genome assembly (<http://genome.ucsc.edu>) and gene specific primer pairs were designed using the  
552 Primer3 program ([http://frodo.wi.mit.edu/primer3/primer3\\_code.html](http://frodo.wi.mit.edu/primer3/primer3_code.html)). Relative gene expression  
553 was normalized using the 36B4 housekeeping gene. The following primer sequences were used:  
554 human and mouse 36B4 (*RPLP0*): F:5'-GTGCTGATGGGCAAGAAC-3'; R:5'-  
555 AGGTCCTCCTTGGTGAAC-3'; human *PTGS2*: F: 5'-CTGGCGCTCAGCCATACAG-3';  
556 R:5'CGCACTTATACTGGTCAAATCCC-3'; human *PDK4*: F:5'-  
557 AGAAAAGCCCAGATGACCAGA-3'; R:5'TGGTTCATCAGCATCCGAGT-3'; human  
558 *CPT1A*: F:5'-CTGTGGCCTTTCAGTTCACG-3'; R:5'-CCACCACGATAAGCCAACTG-3';  
559 human *TGFBI*: F:5'-GGCCTTTCCTGCTTCTCAT-3'; R:5'-CAGAAGTTGGCATGGTAGCC-  
560 3'; human *CXCL1*: F:5'-AGGGAATTCACCCCAAGAAC-3'; R:5'-  
561 ACTATGGGGGATGCAGGATT-3'; human *CXCL9*: F:5'-ATTGGAGTGCAAGGAACCCC-  
562 3'; R:5'-ATTTTCTCGCAGGAAGGGCT-3'; human *CXCL10*: F:5'-GTGGCA  
563 TTCAAGGAGTACCTC-3'; R:5'-TGATGGCCTTCGATTCTGGATT-3'; mouse *Ptgs2*: F:5'-  
564 TGAGTGGGGTGATGAGCAAC-3'; R:5'-TTCAGAGGCAATGCGGTTCT-3'; mouse *Pdk4*:  
565 F:5'-TGAACACTCCTTCGGTGCAG-3'; R:5'-GTCCACTGTGCAGGTGTCTT-3'; mouse  
566 *Ppargc1a*: F:5'-GCTTGACTGGCGTCATTCGG-3'; R:5'-TGTTTCGAGGCTCATT GTTG-3';  
567 mouse *Tgfb1*: F:5'-CACTCCCGTGGCTTCTAGTG-3'; R:5'-GTTGTACAAAGCGAGCACC  
568 G-3'; mouse *Cxcl1*: F:5'-TGGCTGGGATTCACCTCAAG-3'; R:5'-CCGTTACTTGGGGAC  
569 ACCTT-3'; mouse *Cxcl9*: F:5'- AACGTTGTCCACCTCCCTTC-3'; R:5'-CACAGGCTTT

570 GGCTAGTCGT-3'; mouse *Cxcl10*: F:5'-CAAGCCATGGTCCTGAGACA-3'; and R:5'-  
571 TGAGCTAGGGAGGACAAGGA-3'.

572

### 573 **Metascape analysis**

574 PDA TCGA Firehose Legacy data base provides mRNA expression data for co-expression  
575 analysis accessible through cBioportal. The data set includes Spearman's correlation analysis and  
576 P-values for each gene comparison. The data set was used to identify genes negatively correlated  
577 with GOT2 expression in PDA patients. A list of genes with Spearman's correlation value of equal  
578 or less than -0.25 and a P-value of less than 0.01 was generated. The list of genes was submitted  
579 to online bioinformatics tool Metascape for identification of enriched gene ontology clusters in the  
580 data set. The output from Metascape analysis was graphed using GraphPad Prism.

581

### 582 **Orthotopic PDAC modeling**

583 The orthotopic transplant method used here was described previously<sup>6</sup>. In brief, 8- to 10-week-old  
584 wild-type male C57BL/6J (for FC1245) or B6129SF1/J (for 688M) mice were orthotopically  
585 transplanted as described previously with  $5 \times 10^3$  FC1245 cells or  $8 \times 10^4$  688M cells in 50%  
586 Matrigel (Corning 356231), 50% DMEM. For experiments with 688M cells harboring VP16-  
587 PPAR $\delta$ ,  $6 \times 10^4$  688M cells were used. For pharmacologic activation of PPAR $\delta$ , mice were treated  
588 with vehicle (5% PEG-400, 5% Tween-80 in diH<sub>2</sub>O) or with 4 mg/kg GW501516 in vehicle by  
589 intraperitoneal injection once daily. Vehicle was created and autoclaved before use. GW501516  
590 was created in 10 mM stock in DMSO and stored in 250  $\mu$ l aliquots at -20°C (one for each day of  
591 treatment). On the day of treatment, a vial was thawed, diluted 1:10 in vehicle, and mice were  
592 dosed at 4 mg/kg. For T cell neutralization experiments, mice received intraperitoneal injection of

593 0.2 mg of  $\alpha$ CD8 (2.43),  $\alpha$ CD4 (GK1.5), or an IgG2b isotype control (LTF-2) diluted in 100  $\mu$ l  
594 sterile PBS. Antibodies were purchased from BioXcell and were administered beginning 2 days  
595 pre-implantation with  $6 \times 10^4$  688M cells and every 4 days thereafter until euthanasia, as previously  
596 described<sup>7</sup>. Mice were euthanized when control animals were moribund, and tumors were excised,  
597 weighed, and immediately fixed in formalin.

598

### 599 **Long chain fatty acid binding site prediction**

600 The arachidonic acid binding site on the human GOT2 surface is predicted using the molecular  
601 modeling technique. Druggable hotspots identification has long been used to predict and explore  
602 the allosteric pockets that accommodate substrate and drug-like molecules<sup>8,9</sup>. A similar approach  
603 is taken to identify a plausible arachidonic acid binding site by probing the GOT2 3-D protein  
604 structure<sup>10</sup> (PDBID:5AX8). The protein structure was prepared using the protein prep tool of  
605 Maestro-2014-3 (Schrödinger, LLC, New York, NY, 2013). Arachidonic acid is a 20 carbon long-  
606 chain fatty acid (LCFA) with greasy carbons and a carboxylate group. The available structural  
607 information suggests that the binding pocket must be hydrophobic with the positively charged  
608 residues to accommodate LCFA<sup>11,12</sup>.

609

610 The SiteMap<sup>13</sup> calculation accounts for the prediction of pockets, characterized by cavity volume,  
611 chemical, and physical properties as that of known druggable sites. Five sites were predicted on  
612 the GOT2 structure, and these sites had a site score of  $> 0.8$ , composed of hydrophobic, hydrogen  
613 bond acceptor, and donor volumes. The top-ranked site-1 is a catalytic site, and site-2 to 5 are  
614 allosteric. Arachidonic acid docked against all the predicted sites. The Induced-Fit docking  
615 protocol<sup>14</sup> adopted here allows both the ligand and the surrounding residues of protein to be



616 flexible. A total of five docking runs were performed on the predicted site. The docking grid boxes  
617 are defined based on the residues suggested by the SiteMap analysis (Site-1: N215, H210; Site-2:  
618 N270, F239; Site-3: A260, W226, H373, G385, Q390; Site-4: R337, G254; Site-5: N332, D93).  
619 The site-2 ~25 Å away from the catalytic site resulted in a binding pose with favorable energy and  
620 interaction complementarity between the protein and ligand. Compared to other sites, Site-2 has  
621 increased hydrophobic volume, which may recognize LCFA like arachidonic acid. Triple mutants  
622 K234A/K296/R303 were proposed to validate the predicted binding pose. K234 interacts with the  
623 carboxylate group of LCFA. K296, which is in proximity to making ionic interaction (in dynamics)  
624 and perturbation of the positive charge to neutral alanine residues, prevents the charged interaction.  
625 From the docking pose, R303 is making the hydrophobic interaction with the lipid tail of  
626 arachidonic acid. R303A mutation reduces the hydrophobic interaction by the sidechain of  
627 arginine. The proposed triple mutations have the potential to abolish the arachidonic acid binding.

628

### 629 **Fatty acid binding assay**

630 Reactions were carried out in binding buffer (0.003% digitonin in 1X PBS) containing 1 µM of  
631 purified human GOT2 protein (AA30-430) and 0.5 µCi/ml [<sup>3</sup>H]-arachidonic Acid. After  
632 incubation for 1hr at 4°C, the mixture was incubated with pre-equilibrated of TALON Metal  
633 Affinity Resin (Takara, 635502) at 4°C for 1 h, then loaded onto a column and washed with binding  
634 buffer, then binding buffer with 0.01% BSA, and binding buffer again. The protein-bound [<sup>3</sup>H]-  
635 arachidonic was eluted with elution buffer (50 mM sodium phosphate, 300 mM sodium chloride,  
636 150 mM imidazole; pH 7.4.) and quantified by scintillation counting. For competition experiments  
637 with unlabeled lipids, the assays were carried out in the presence of ethanol containing the  
638 indicated unlabeled sterol (0–1 mM).

639

640 **Luciferase assay**

641 PPRE x3-TK-Luc (PPAR response element driving luciferase) plasmid #1015 was purchased from  
642 Addgene and the Renilla plasmid (pRL-SV40) was generously provided by Dr. Ellen Langer  
643 (OHSU). Cells were transfected with 2.5 µg PPRE x3-TK-Luc, 15 ng pRL-SV40, and 4 µl  
644 Lipofectamine 2000 in 6-well plates. Briefly, cells were plated at  $1 \times 10^6$  per well of a 6-well plate  
645 and allowed to adhere overnight. Plasmids were combined in 150 µl Opti-MEM while  
646 lipofectamine 2000 was combined in a separate tube with 150 µl Opti-MEM. After 5 mins the  
647 tubes were combined. 300 µl of the mixture was added, in a dropwise manner, to 700 µl of Opti-  
648 MEM on each well for transfection. The cells were incubated overnight at 37°C, collected,  
649 counted, and replated to white-walled 96-well plates in triplicates. 24 hours later a dual luciferase  
650 assay was completed, following the manufacturer's instructions: Dual-Luciferase Reporter Assay  
651 System (Promega E1910). Briefly, cells were lysed in white-walled 96-well plates with 20 µl 1X  
652 Passive Lysis Buffer and shaken on a room temp shaker. 100 µl LARII was added to each well  
653 and luminescence was measured over 5 seconds. 100 µl of Stop and Glo were then added and  
654 Renilla activity was measured with luminescence over 5 seconds. Activity was calculated by  
655 normalizing luciferase signal to renilla for each well.

656

657 **PPARδ transcription factor activity assay**

658 Nuclear lysates were prepared using a detergent-free fractionation protocol. Cells were scraped  
659 and collected from 10 cm dishes, washed with PBS, pelleted (450 x g 5mins), resuspended in PBS  
660 and 1/5 of the volume was reserved for whole cell lysis in RIPA (Amresco N653-100mL) +  
661 cOmplete EDTA-free Protease inhibitor cocktail (Sigma-Aldrich 11836170001). The remaining

662 4/5 of cell suspension was centrifuged (450 x g 5mins), PBS removed and cells were lysed on ice  
663 for 15 mins in Lysis buffer (5x of cell pellet volume). Lysis Buffer: 10mM HEPES pH 7.9, 1.5mM  
664 MgCl<sub>2</sub>, 10mM KCl with 1mM DTT and EDTA-Free cOmplete mini protease inhibitor cocktail.  
665 Lysates were centrifuged (450 x g 5mins), supernatant decanted, lysis buffer added (2x cell  
666 volume) and suspensions ground on ice with a plastic homogenizer 10x in 1.5mL Eppendorf tubes.  
667 Lysates were centrifuged (10,000 x g 20mins) and supernatant collected as cytosolic fraction.  
668 Remaining pellet was washed with 200 µl lysis buffer (10,000 x g 5mins), supernatant decanted  
669 and extraction buffer added (2/3x cell pellet volume). Extraction buffer: 20mM HEPES pH 7.9,  
670 1.5mM MgCl<sub>2</sub>, 0.42M NaCl, 0.2uM EDTA, 25% glycerol (V/V), 1mM DTT and cOmplete mini  
671 EDTA-free protease inhibitor cocktail. Nuclei were ground with plastic homogenizer in 1.5mL  
672 Eppendorf tubes 20x, and incubated at 4°C with gentle shaking for 10 mins. Samples were  
673 centrifuged (20,000 x g 5mins) and supernatant transferred to cold Eppendorf tubes, as nuclear  
674 fraction. Lysates were measured with BCA and an equal protein amount was added per sample for  
675 each well. Manufacturer's instructions were followed for the PPAR delta transcription factor kit  
676 (Abcam ab133106). Briefly CTFB was prepared and added to blank and NSB wells, nuclear  
677 lysates were added to each sample well containing immobilized PPRE-containing DNA and the  
678 plate was incubated overnight at 4°C without agitation. The next day the wells were washed 5x in  
679 1X wash buffer and incubated in PPARdelta primary antibody (1:100) for 1hr at room temperature  
680 in the dark, without agitation. Wells were washed 5x in 1X wash buffer and incubated in goat anti-  
681 rabbit HRP conjugate (1:100) for 1hr at room temperature in the dark without agitation. Wells  
682 were washed 5x in 1X wash buffer and 100 µl developing solution was added to each well. Plate  
683 was incubated for 15-45 minutes on a room temperature shaker, in the dark, until color developed.  
684 100 µl stop solution was added to wells and the absorbance at 450nm was taken.

685

### 686 **Nuclear fatty acid uptake assay**

687 MiaPaca2 ctrl and sh27 cells were plated at  $5 \times 10^5$  in a 6 well plate and allowed to adhere  
688 overnight. Media was changed to 0% FBS DMEM and the cells were incubated for 24hrs. The  
689 media was changed to 0.5% Fatty-Acid Free BSA DMEM with either chloroform (ctrl) or 2.5  $\mu\text{M}$   
690 NBD-arachidonic acid (Avanti Polar Lipids 810106C). Media was made before being added to  
691 cells, heated to 37°C and vortexed until fatty acid was completely in solution. Cells were incubated  
692 at 37°C for durations indicated in the manuscript and collected and fractionated using the  
693 Detergent Free Method described above (PPAR $\delta$  transcription factor activity assay). Nuclear  
694 lysates were placed in a white-walled 96-well plate and fluorescence was measured at 480 nm  
695 excitation and 540 nm emission. Lysate concentration was measured using a BCA kit. FC1245  
696 cells were plated  $5 \times 10^5$  per well and treated as described above, but treatment was reduced to 2  
697  $\mu\text{M}$  NBD-arachidonic acid for 15 minutes due to lipid toxicity in this cell line.

698

### 699 **Aspartate aminotransferase assay**

700 AST Activity Assay Kit (Sigma-Aldrich MAK055) was used to determine aspartate  
701 aminotransferase activity per manufacturer instructions. Briefly, this assay determines the transfer  
702 of an amino group from aspartate to alpha-ketoglutarate in the generation of glutamate which  
703 produces a colorimetric product (450 nm) that is proportional to aspartate aminotransferase activity  
704 in the sample. For this assay Pa-Tu-8988T cells with stable expression of doxycycline inducible  
705 GOT2 shRNA were transiently transfected with wtGOT2 and tmGOT2. After 48hrs these cells  
706 were exposed to doxycycline for 48hrs to knockdown endogenous GOT2 in cells with GOT2  
707 shRNA. Cells were seeded at  $5 \times 10^6$  and collected via trypsin disassociation after cells were

708 adhered. The cells were then resuspended in 1ml of ice-cold 1X PBS and 200  $\mu$ l ( $1 \times 10^6$  cells)  
709 were collected for AST assay and 800  $\mu$ l ( $4 \times 10^6$  cells) were collected for protein concentration  
710 estimation and Western blot protein expression analysis. Using AST assay kit buffers, cells were  
711 lysed to obtain a supernatant which was combined with the kit reagent master mix to detect  
712 glutamate in a colorimetric reaction. The samples were read every 5 minutes for 30 minutes. AST  
713 activity and concentration in the samples were determined using instructions from the  
714 manufacturer.

715

### 716 **Free fatty acid measurements**

717 Samples were subjected to an LCMS analysis to detect and quantify levels of free fatty acids in  
718 sample extracts. A fatty acid extraction was carried out on each sample using 100% methanol as  
719 the homogenization solvent. Whole cell pellets ( $1 \times 10^6$  cells/sample) were lysed with 1000  $\mu$ L of  
720 methanol and  $\sim$ 100  $\mu$ L of zircon beads (0.5 mm). Manual disruption with a p1000 pipette tip was  
721 performed to assist initial pellet suspension in extraction buffer. The methanol extracts were  
722 centrifuged (21,000g x 3 min) and transferred to glass LCMS inserts for analysis. The LC column  
723 was a Waters<sup>TM</sup> BEH-C18 (2.1 x100 mm, 1.7  $\mu$ m) coupled to a Dionex Ultimate 3000<sup>TM</sup> system  
724 and the column oven temperature was set to 25°C for the gradient elution. The flow rate was 0.1  
725 mL/min and used the following buffers; A) water with 0.1% formic acid and B) acetonitrile with  
726 0.1% formic acid. The gradient profile was as follows; 60-99%B from 0-6 min, hold at 99%B from  
727 6-10 min, 99-60%B from 10-11 min, hold at 60%B from 11-15 min. Injection volume was set to  
728 1  $\mu$ l for all analyses (15 min total run time per injection).

729 MS analyses were carried out by coupling the LC system to a Thermo Q Exactive HFTM  
730 mass spectrometer operating in heated electrospray ionization mode (HESI). Data acquisition was

731 10 min with a negative mode full MS scan (profile mode) and one microscan, with an AGC target  
732 of 3e6 and a maximum IT of 100 ms at 120,000 resolution, with a scan range from 160-400 m/z.  
733 Spray voltage was 3.5kV and capillary temperature was set to 320°C with a sheath gas rate of 35,  
734 aux gas of 10, and max spray current of 100  $\mu$ A. The acquisition order of samples and standard  
735 curve points was randomized, with blank matrix controls before and after each standard curve  
736 point to assess carry over (none detected). The resulting free fatty acid peaks were quantified by  
737 measuring the relative intensities (peak heights) of the high resolution extracted ion chromatogram  
738 (XIC) for each fatty acid across the samples and external standard curve samples ranging from 10  
739  $\mu$ g/mL to 100 ng/mL. All fatty acids were detected as the negative mode [M-H] ion and retention  
740 times of the fatty acids were defined using a cocktail of authentic standards. For each XIC, the  
741 theoretical m/z of each fatty acid ( $\pm$  5 ppm) was used to extract the peak height (24 sec retention  
742 time window, 12 sec retention time tolerance) as follows: Lauric acid (199.1704 m/z, 2.3 min),  
743 Myristic acid (227.2017 m/z, 3.1 min), Palmitoleic acid (253.2173 m/z, 3.4 min), Palmitic acid  
744 (255.2330 m/z, 4.1 min), Oleic acid (281.2486 m/z, 4.4 min), Stearic acid (283.2643 m/z, 5.1 min),  
745 Arachidic acid (311.2956 m/z, 6.0 min), Nervonic acid (365.3425 m/z, 6.9 min), Lignoceric acid  
746 (367.3582 m/z, 7.5 min). The resulting standard curve points (in duplicate) were fit to a linear  
747 regression (GraphPad Prism8), and this equation was used to interpolate the concentration of fatty  
748 acids in the sample extracts, as prepared.

749

## 750 **Statistical Analysis**

751 All statistical analyses were performed using GraphPad Prism 9.0 Software (Graph Pad Software  
752 Inc.).

753

754

## 755 **Methods references**

- 756
- 757
- 758 1 Engle, D. D. *et al.* The glycan CA19-9 promotes pancreatitis and pancreatic cancer in  
759 mice. *Science* **364**, 1156-1162, doi:10.1126/science.aaw3145 (2019).
- 760 2 Gruner, B. M. *et al.* An in vivo multiplexed small-molecule screening platform. *Nat*  
761 *Methods* **13**, 883-889, doi:10.1038/nmeth.3992 (2016).
- 762 3 Narkar, V. A. *et al.* AMPK and PPARdelta agonists are exercise mimetics. *Cell* **134**, 405-  
763 415, doi:10.1016/j.cell.2008.06.051 (2008).
- 764 4 Farrell, A. S. *et al.* MYC regulates ductal-neuroendocrine lineage plasticity in pancreatic  
765 ductal adenocarcinoma associated with poor outcome and chemoresistance. *Nat Commun*  
766 **8**, 1728, doi:10.1038/s41467-017-01967-6 (2017).
- 767 5 Sherman, M. H. *et al.* Vitamin D receptor-mediated stromal reprogramming suppresses  
768 pancreatitis and enhances pancreatic cancer therapy. *Cell* **159**, 80-93,  
769 doi:10.1016/j.cell.2014.08.007 (2014).
- 770 6 Collisson, E. A. *et al.* A central role for RAF-->MEK-->ERK signaling in the genesis of  
771 pancreatic ductal adenocarcinoma. *Cancer Discov* **2**, 685-693, doi:10.1158/2159-  
772 8290.CD-11-0347 (2012).
- 773 7 Evans, R. A. *et al.* Lack of immunoediting in murine pancreatic cancer reversed with  
774 neoantigen. *JCI Insight* **1**, doi:10.1172/jci.insight.88328 (2016).
- 775 8 Ma, B. & Nussinov, R. Druggable orthosteric and allosteric hot spots to target protein-  
776 protein interactions. *Curr Pharm Des* **20**, 1293-1301,  
777 doi:10.2174/13816128113199990073 (2014).
- 778 9 Buhrman, G. *et al.* Analysis of binding site hot spots on the surface of Ras GTPase. *J Mol*  
779 *Biol* **413**, 773-789, doi:10.1016/j.jmb.2011.09.011 (2011).
- 780 10 Jiang, X., Wang, J., Chang, H. & Zhou, Y. Recombinant expression, purification and  
781 crystallographic studies of the mature form of human mitochondrial aspartate  
782 aminotransferase. *Biosci Trends* **10**, 79-84, doi:10.5582/bst.2015.01150 (2016).
- 783 11 Nojima, S. *et al.* Cryo-EM Structure of the Prostaglandin E Receptor EP4 Coupled to G  
784 Protein. *Structure*, doi:10.1016/j.str.2020.11.007 (2020).
- 785 12 Matthews, S. *et al.* Catalytic Determinants of Alkene Production by the Cytochrome  
786 P450 Peroxygenase OleTJE. *J Biol Chem* **292**, 5128-5143, doi:10.1074/jbc.M116.762336  
787 (2017).
- 788 13 Halgren, T. A. Identifying and characterizing binding sites and assessing druggability. *J*  
789 *Chem Inf Model* **49**, 377-389, doi:10.1021/ci800324m (2009).
- 790 14 Sherman, W., Day, T., Jacobson, M. P., Friesner, R. A. & Farid, R. Novel procedure for  
791 modeling ligand/receptor induced fit effects. *J Med Chem* **49**, 534-553,  
792 doi:10.1021/jm050540c (2006).

793

794

## 795 **Acknowledgements**

796 We thank all members of the Sherman lab as well as Drs. Sara Courtneidge and Amy Moran for  
797 helpful discussion of this work. This study was supported by a postdoctoral fellowship from the

798 OHSU Fellowship for Diversity in Research (to J.A.), a graduate student fellowship from the  
799 Knight Cancer Institute Cancer Center Support Grant P30 CA069533 (to H.S.-C.), NIH grants R00  
800 CA188259 and R01 CA229580 (to M.H.S.) including CA229580-S1 Research Supplement to  
801 Promote Diversity in Health-Related Research (awarded to M.H.S. in support of J.A.), American  
802 Cancer Society grant RSG-18-142-01-CSM (to M.H.S.), and an OHSU Faculty Innovation Fund  
803 Award (to M.H.S.). We thank members of the OHSU Histopathology Shared Resource, Medicinal  
804 Chemistry Core, and Advanced Light Microscopy Shared Resource for supporting this study, as  
805 well as Dr. Drew Jones and Leonard Ash from the NYU Langone Health Metabolomics  
806 Laboratory.

807

#### 808 **Author contributions**

809 H.S.-C., J.A. and M.H.S. conceived the study and designed the experiments; H.S.-C. and J.A.  
810 generated all cell lines and performed the majority of the experiments including all mouse studies;  
811 C.O. generated the VP16-PPARD and GOT2 constructs, aided in cell line generation, and  
812 performed *in vitro* studies; X.X. performed the competitive fatty acid binding assays with guidance  
813 from P.T.; S.N. performed the GOT2 docking studies and computational modeling of arachidonic  
814 acid binding; S.B. performed immunohistochemistry on PDAC patient samples; all authors  
815 contributed to data analysis; H.S.-C., J.A. and M.H.S. wrote the paper with input from all authors.

816

#### 817 **Competing interest declaration**

818 The authors declare no competing interests.

819

#### 820 **Additional information**



- 821 Supplementary Information is available for this paper. Correspondence and requests for materials  
822 should be addressed to M.H.S. ([shermama@ohsu.edu](mailto:shermama@ohsu.edu)).

Fig 1

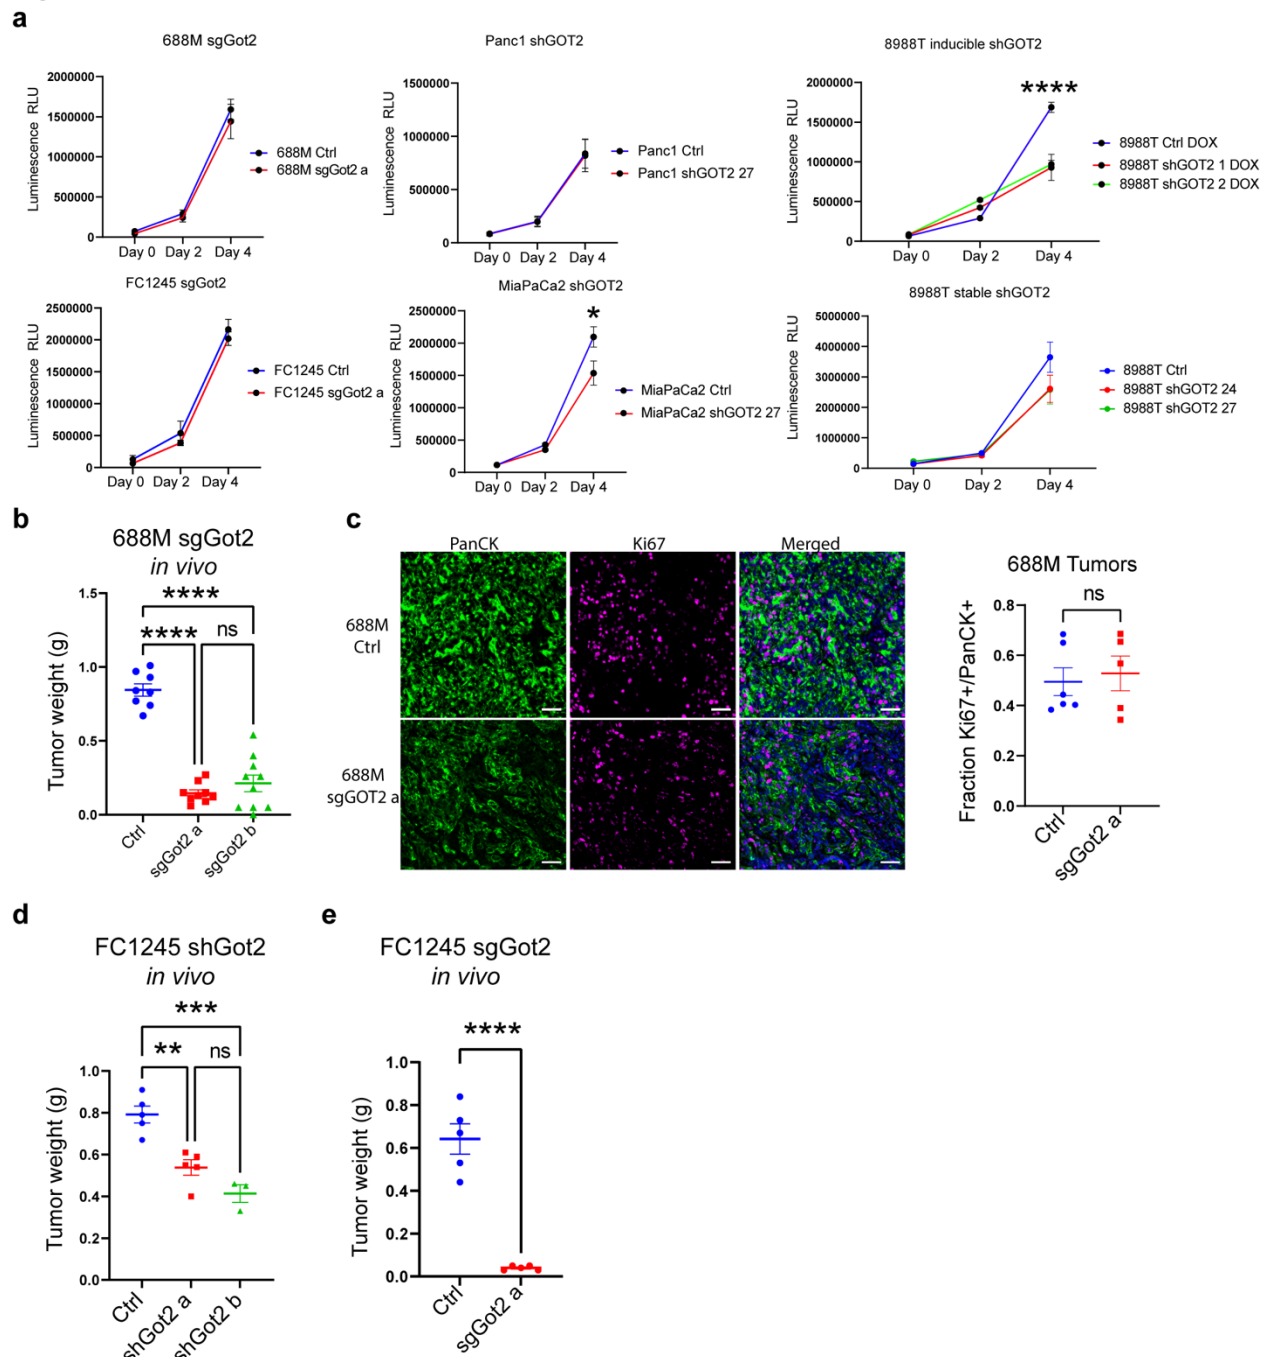

**Figure 1: GOT2 promotes pancreatic tumor progression without impacting proliferation.**

**a**, Viable cell measurements in the indicated PDAC cell lines. Data are presented as mean  $\pm$  s.e.m. from biological triplicates. \* $p < 0.05$ , \*\*\*\* $p < 0.0001$  by one-way ANOVA. **b**, PDAC tumor weight at experimental endpoint, 34 days after orthotopic transplantation of 688M cells into immune-competent hosts. Ctrl:  $n = 8$ , sgGot2 a:  $n = 9$ , sgGot2 b:  $n = 10$ . Data are presented as mean  $\pm$  s.e.m. \*\*\*\* $p < 0.0001$  by one-way ANOVA. **c**, Immunohistochemical staining of tumors in **b** for Ki67 (proliferation) and pan-cytokeratin (panCK, tumor cells), with a DAPI counterstain (nuclei). Representative images are shown on the left (scale bar = 50  $\mu$ m), with quantification on the right (Ctrl:  $n = 6$ , sgGot2:  $n = 5$ ). Data are presented as mean  $\pm$  s.e.m. ns = not significant by unpaired t-test. **d**, PDAC tumor weight at experimental endpoint, 22 days after orthotopic transplantation of FC1245 cells into immune-competent hosts. Ctrl:  $n = 5$ , shGot2 a:  $n = 5$ , shGot2 b:  $n = 3$ . Data are presented as mean  $\pm$  s.e.m. \*\* $p < 0.01$ , \*\*\* $p < 0.001$  by one-way ANOVA. **e**, PDAC tumor weight at experimental endpoint, 18 days after orthotopic transplantation of FC1245 cells into immune-competent hosts. Ctrl:  $n = 5$ , sgGot2:  $n = 5$ . Data are presented as mean  $\pm$  s.e.m. \*\*\*\* $p < 0.0001$  by unpaired t-test.

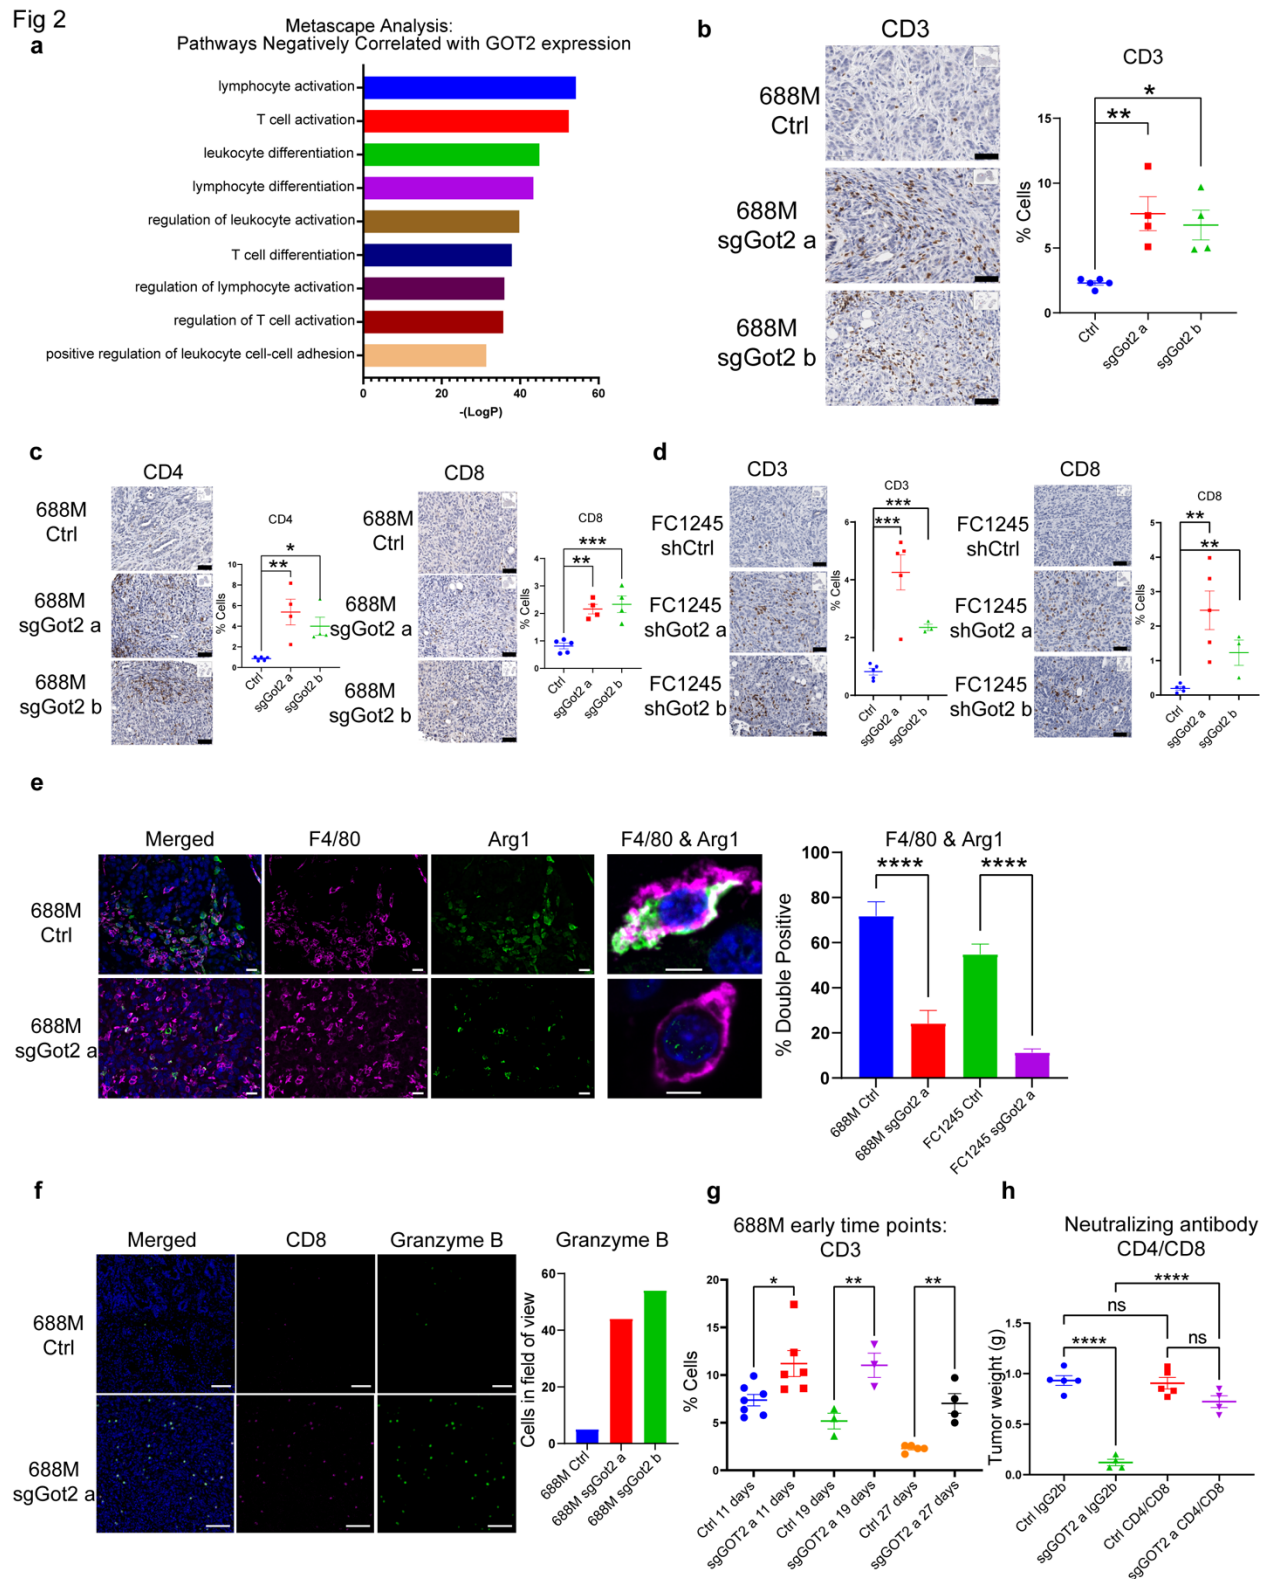

**Figure 2: PDAC cell-intrinsic GOT2 suppresses T cell-dependent immunologic control of tumor growth.**

**a**, Metascape pathway analysis depicting transcriptional programs inversely correlated with GOT2 expression in human PDAC. **b,c**, Immunohistochemical staining of control and sgGot2 688M tumors for T cell marker CD3 (**b**) and subtype markers CD4 and CD8 (**c**). Representative images are shown on the left (scale bar = 50  $\mu$ m), with quantification on the right (Ctrl: n = 5, sgGot2 a: n = 4, sgGot2 b: n = 4). **d**, Immunohistochemical staining of control and shGot2 FC1245 tumors for T cell markers CD3 and CD8. Representative images are shown on the left (scale bar = 50  $\mu$ m), with quantification on the right (Ctrl: n = 5, shGot2 a: n = 5, shGot2 b: n = 3). **e**, Immunohistochemical co-staining of control and sgGot2 or shGot2 PDAC for macrophage marker F4/80 and immunosuppressive factor arginase-1. Representative images are from 688M tumors (scale bar on 20X images =

10  $\mu\text{m}$ , scale bar on 63X images = 5  $\mu\text{m}$ ). Quantification of double-positive cells out of total F4/80<sup>+</sup> cells in the 688M and FC1245 models is on the right; data are presented as mean  $\pm$  s.e.m. \*\*\*\* $p < 0.0001$  by unpaired t-test. **f**, Immunohistochemical co-staining of control and sgGot2 688M tumors for T cell marker CD8 and granzyme B (scale bar = 50  $\mu\text{m}$ ), with granzyme B quantification on the right. **g**, Quantification of CD3 immunohistochemistry on 688M PDAC at the indicated time points post-transplantation (Ctrl d11: n = 7, sgGot2 d11: n = 6, Ctrl d19: n = 3, sgGot2 d19: n = 3, Ctrl d27: n = 5, sgGot2 d27: n = 4). \* $p < 0.05$ , \*\* $p < 0.01$  by unpaired t-test. **h**, PDAC tumor weight at experimental endpoint, 27 days after orthotopic transplantation of 688M cells and treatment with isotype control or T cell neutralizing antibodies (details in Methods). Ctrl: n = 5 per cohort, sgGot2: n = 4 per cohort. For **b-h**, data are presented as mean  $\pm$  s.e.m. For **b-e & h**, \* $p < 0.05$ , \*\* $p < 0.01$ , \*\*\* $p < 0.001$ , \*\*\*\* $p < 0.0001$  by one-way ANOVA.

Fig 3

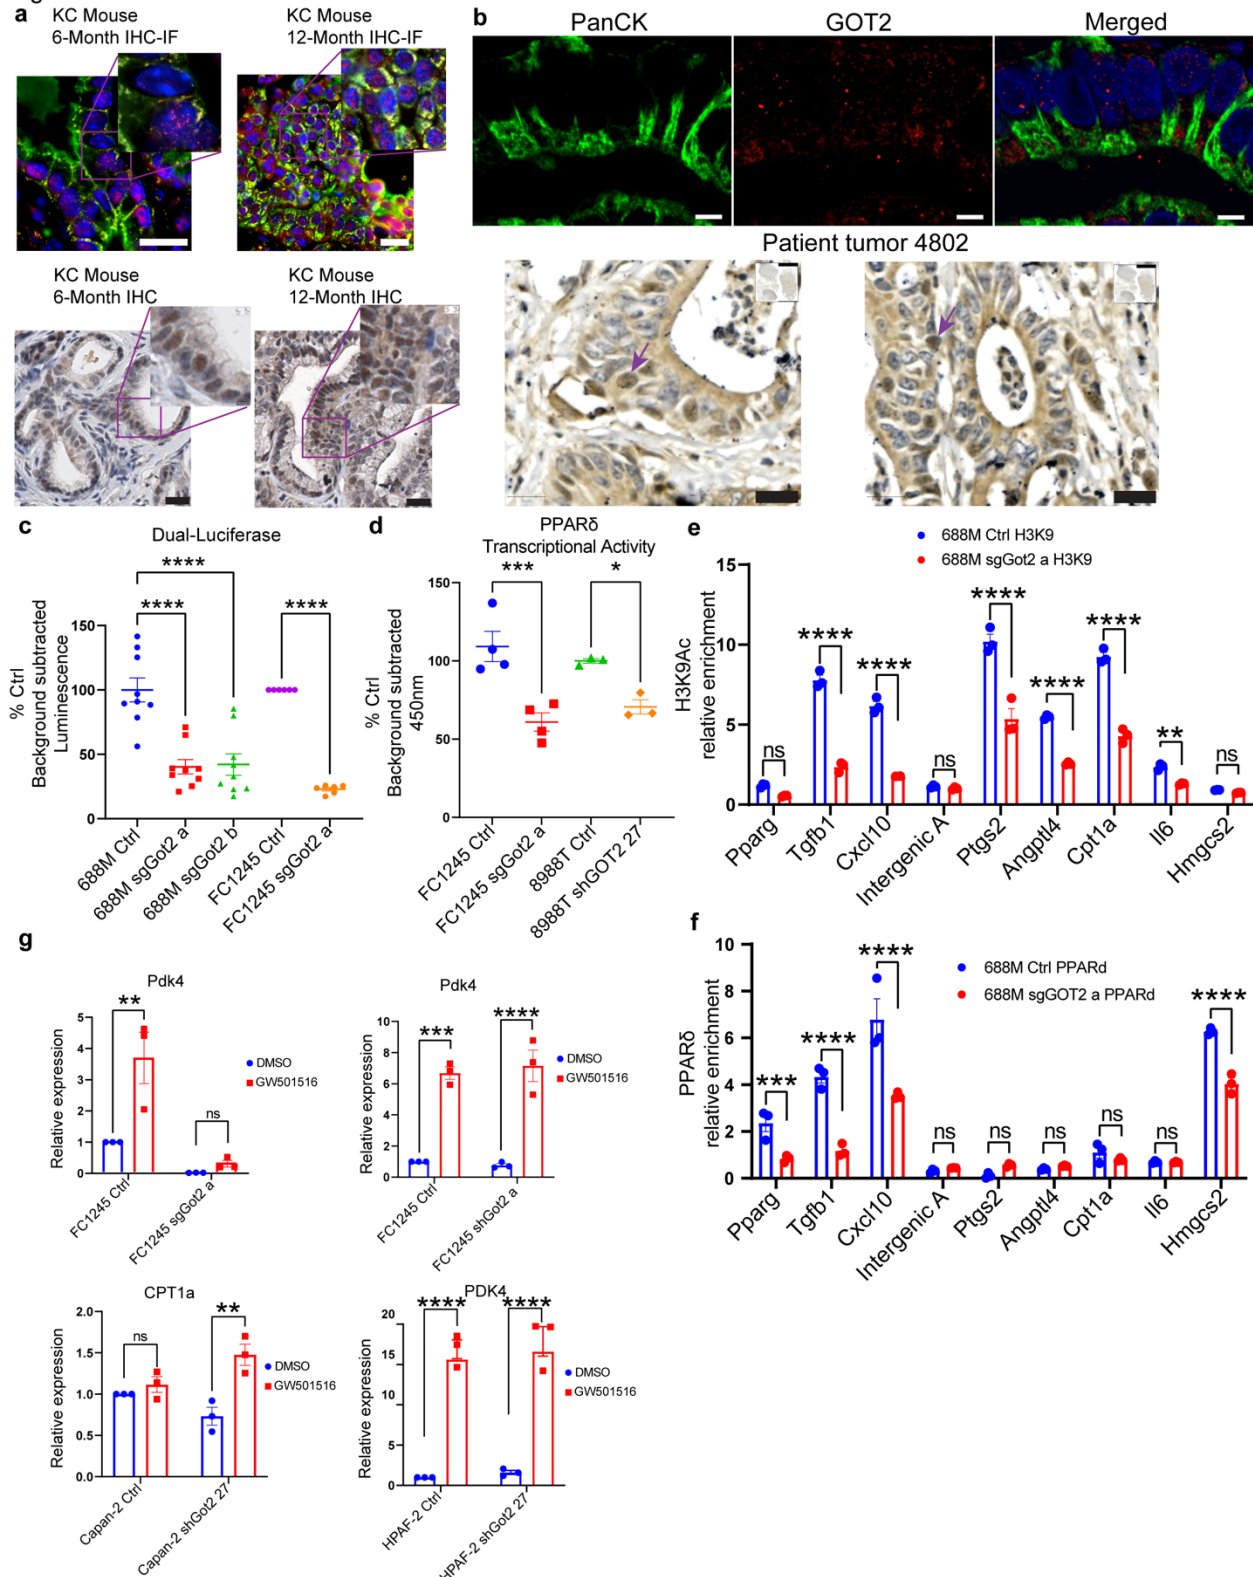

**Figure 3: GOT2 positively regulates PPAR $\delta$  activity.**

**a**, Immunohistochemical staining for GOT2 or GOT2 and panCK in pancreas tissues from *Kras<sup>LSL-G12D/+</sup>;Pdx1-Cre* (KC) mice at 6 or 12 months of age (representative of n = 4 per time point). Scale bar = 20  $\mu$ m. **b**, Immunohistochemical staining for GOT2 or GOT2 and panCK in human PDAC (representative of n = 5). Fluorescent images: scale bar = 5  $\mu$ m, brightfield image: scale bar = 20  $\mu$ m. Arrows indicate examples of tumor cells with nuclear GOT2. **c**, Luciferase assay for PPRE activity in the indicated cell lines, normalized to renilla, presented as mean  $\pm$  s.e.m. \*\*\*\*p < 0.0001 by one-way ANOVA (688M) or unpaired t-test (FC1245). **d**, PPAR $\delta$  transcriptional activity assay, reading out binding to immobilized DNA containing PPREs, in the indicated cell

lines. Data are presented as mean  $\pm$  s.e.m. from 4 (FC1245) or 3 (8988T) independent experiments. \* $p < 0.05$ , \*\*\* $p < 0.001$  by unpaired t-test. **e,f**, Chromatin immunoprecipitation (ChIP) for **(e)** H3K9Ac and **(f)** PPAR $\delta$  in control or sgGot2 688M PDAC cells, followed by qPCR for proximal promoter regions of the indicated genes. Data were normalized to an intergenic region (intergenic B; intergenic A was an additional control region) and are presented as mean  $\pm$  s.e.m. from biological triplicates. \*\* $p < 0.01$ , \*\*\* $p < 0.001$  \*\*\*\* $p < 0.0001$  by unpaired t-test. **g**, qPCR for the indicated PPAR $\delta$ -regulated genes in control or GOT2-knockdown PDAC cells, treated with vehicle (DMSO) or PPAR $\delta$  synthetic agonist GW501516 (100 nM). Data are presented as mean  $\pm$  s.e.m. from biological triplicates. \*\* $p < 0.01$ , \*\*\* $p < 0.001$ , \*\*\*\* $p < 0.0001$  by unpaired t-test.

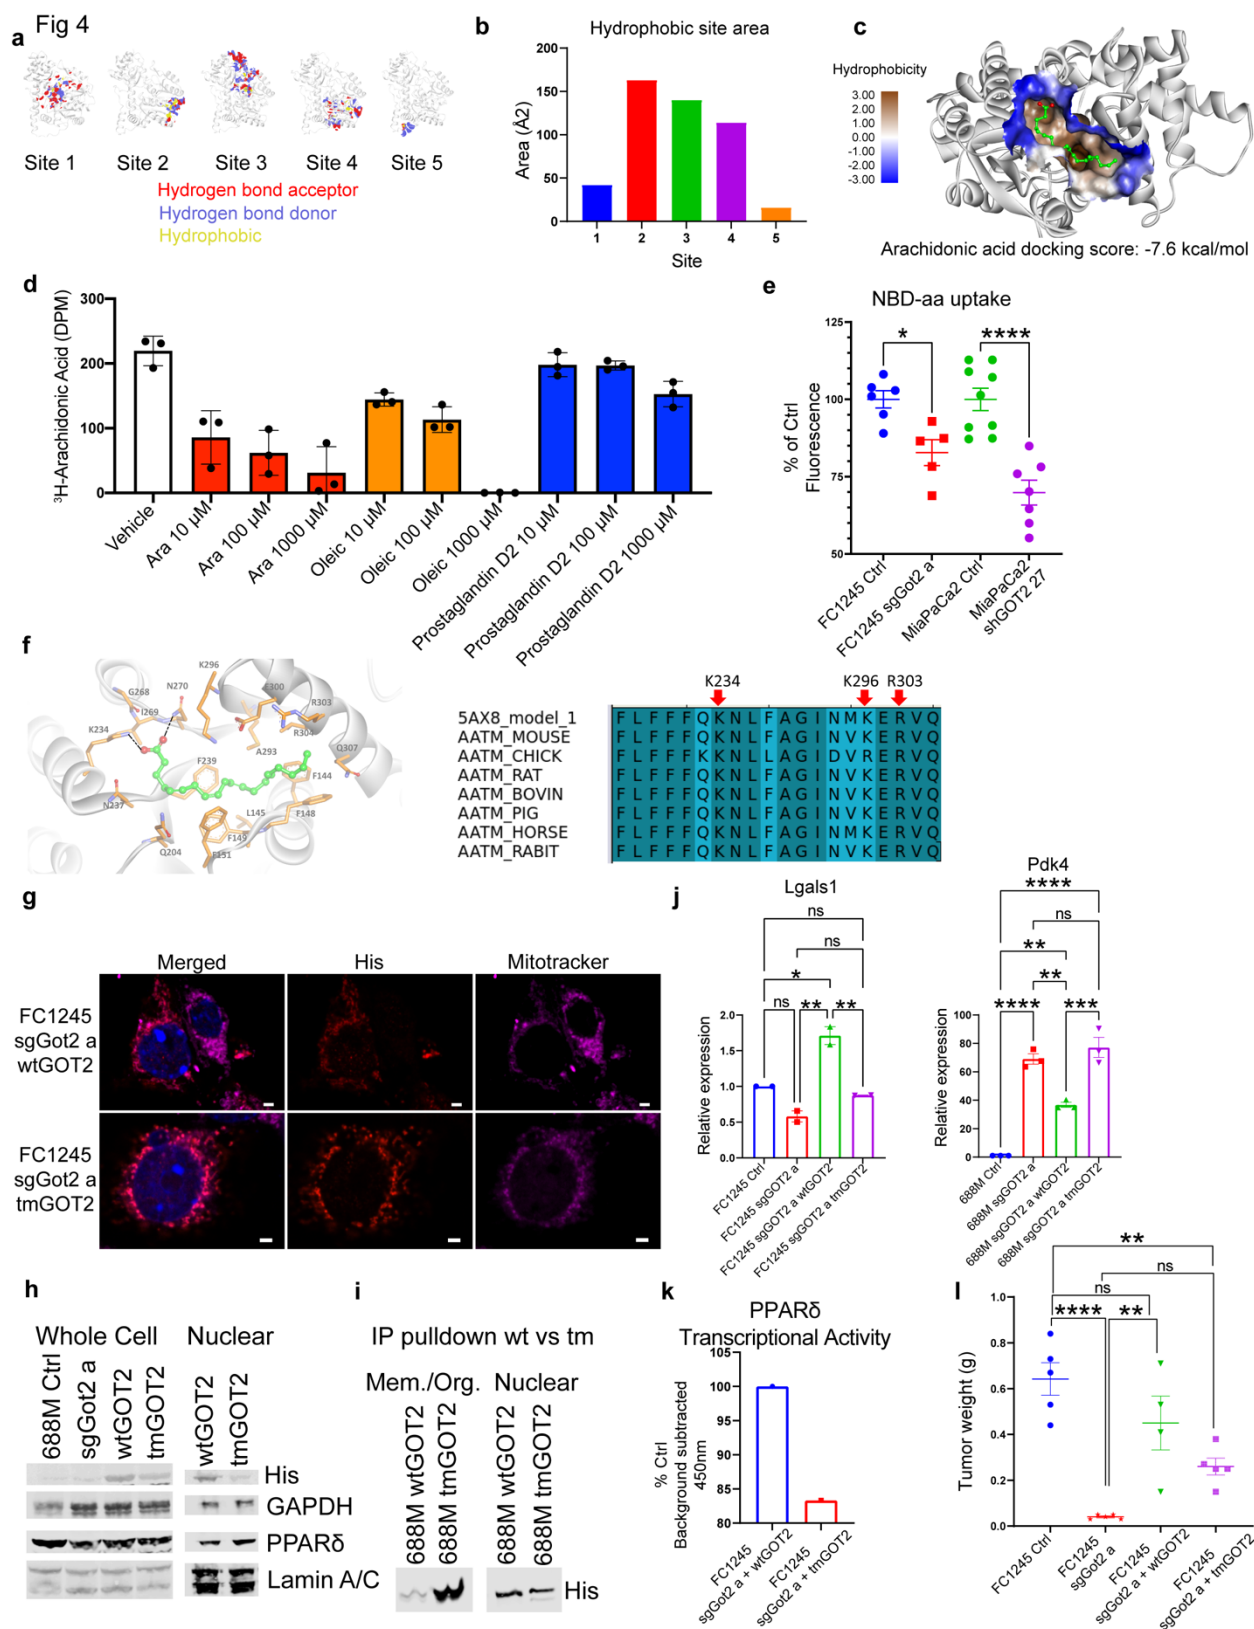

**Figure 4: GOT2 binds to PPAR $\delta$  ligand directly.**

**a**, Hydrophobic site maps on the GOT2 protein, indicating putative fatty acid binding domains. Red: hydrogen bond acceptor, blue: hydrogen bond donor, yellow: hydrophobic. **b**, Plot of the hydrophobic area of the putative fatty acid binding sites depicted in **a**. **c**, Docking model of arachidonic acid in site 2 on the GOT2 protein, with bioenergetic docking score (-7.6 kcal/mol) indicated below. **d**, Competitive fatty acid binding assay, measuring radioactivity upon incubating purified human GOT2 with  $^3\text{H}$ -arachidonic acid (1  $\mu\text{M}$ ) and the indicated concentrations of cold lipid species. **e**, Nuclear accumulation of NBD-arachidonic acid after the indicated cell

lines were incubated with 2.5  $\mu$ M NBD-aa for 2 hr (MiaPaCa2) or 2  $\mu$ M NBD-aa for 15 min (FC1245). Data are presented as mean  $\pm$  s.e.m. \* $p$  < 0.05, \*\*\*\* $p$  < 0.0001 by unpaired t-test. **f**, (Left) Model of arachidonic acid bound to GOT2, indicating amino acid residues that potentially facilitate binding. Based on this model, K234, K296, and R303 were selected for mutation to alanine. (Right) Conservation of GOT2 amino acid sequence, including the 3 residues predicted to support arachidonic acid binding, among higher vertebrates. **g**, Immunofluorescence staining of wtGOT2 and tmGOT2 (both His-tagged) in PDAC cells, with a DAPI nuclear counterstain. Scale bar = 2  $\mu$ m. **h**, Western blot on whole cell lysates and nuclear extracts on the indicated 688M stable cell lines. **i**, His immunoprecipitation and Western blot from membrane/organelle fractions versus nuclear fractions in the indicated 688M stable cell lines. **j**, qPCR for the indicated PPAR $\delta$ -regulated genes in FC1245 stable cell lines, normalized to *36b4*. Data are presented as mean  $\pm$  s.e.m. from biological triplicates. \* $p$  < 0.05, \*\* $p$  < 0.01, \*\*\* $p$  < 0.001, \*\*\*\* $p$  < 0.0001 by one-way ANOVA. **k**, PPAR $\delta$  transcriptional activity assay in the indicated FC1245 stable cell lines. **l**, PDAC tumor weight at experimental endpoint, 18 days after orthotopic transplantation of the indicated FC1245 cells. Ctrl: n = 5, sgGot2: n = 5, sgGot2 + wtGOT2: n = 4, sgGot2 + tmGOT2: n = 5. Ctrl and sgGot2 arms here are also depicted in Figure 1e. Data are presented as mean  $\pm$  s.e.m. \*\* $p$  < 0.01, \*\*\*\* $p$  < 0.0001 by one-way ANOVA.





cells stably transduced with empty vector or VP16-PPAR $\delta$ . Data are presented as mean  $\pm$  s.e.m. **f,g**, PDAC tumor weight at experimental endpoint in the indicated (**f**) 688M and (**g**) FC1245 lines. 688M: Ctrl: n = 5, sgGot2: n = 4, Ctrl VP16-PPAR $\delta$ : n = 4, sgGot2 VP16-PPAR $\delta$ : n = 4, endpoint = day 27. FC1245: Ctrl: n = 5, sgGot2: n = 5, Ctrl VP16-PPAR $\delta$ : n = 5, sgGot2 VP16-PPAR $\delta$ : n = 4, endpoint = day 18. Ctrl and sgGot2 FC1245 arms here are also depicted in Figure 1e. \*p < 0.05, \*\*p < 0.01, \*\*\*p < 0.001, \*\*\*\*p < 0.0001 by one-way ANOVA. **h**, qPCR for PPAR $\delta$ -regulated genes in the indicated FC1245 stable cell lines, normalized to *36b4*. Data are presented as mean  $\pm$  s.e.m. from biological triplicates. \*p < 0.05, \*\*p < 0.01, \*\*\*p < 0.001, \*\*\*\*p < 0.0001 by one-way ANOVA.

ED Fig 1

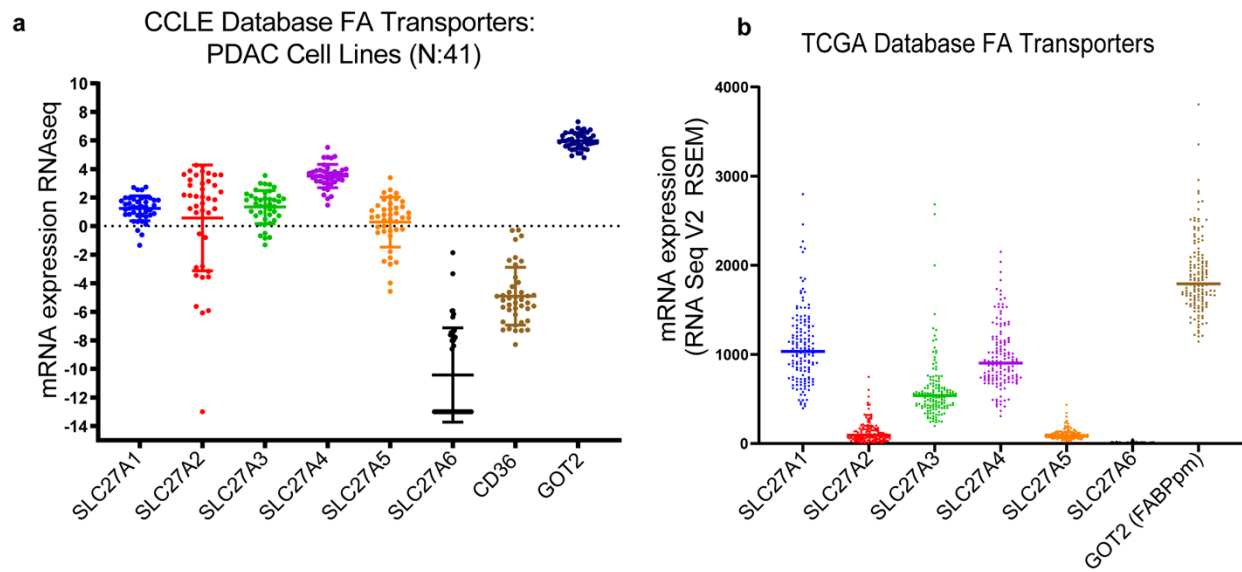

**Extended Data Figure 1: GOT2 is upregulated in human PDAC.**

**a**, Relative expression of the indicated fatty acid transporters and trafficking factors among 41 human PDAC cell lines in the Broad Institute Cancer Cell Line Encyclopedia database. **b**, Relative expression of the indicated fatty acid transporters and trafficking factors in human PDAC in The Cancer Genome Atlas database.

ED Fig 2

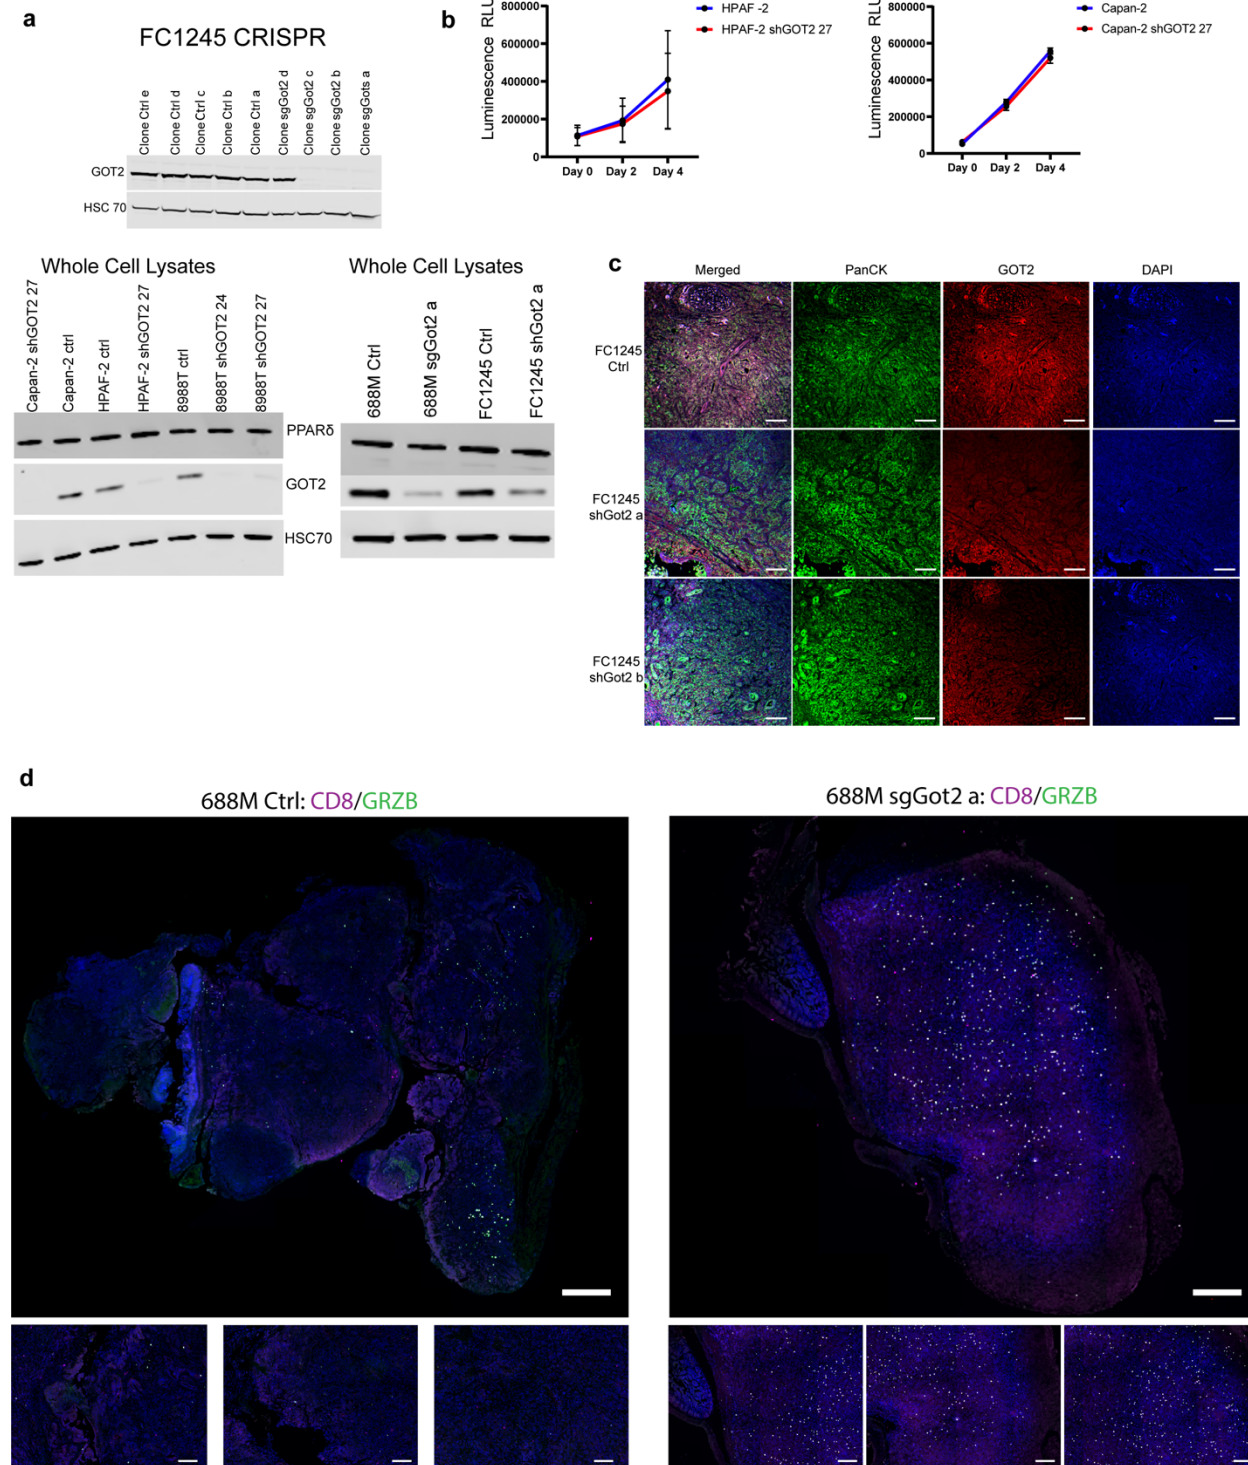

**Extended Data Figure 2: PDAC cells maintain proliferative capacity with loss of GOT2 expression.**

**a**, Western blots indicating GOT2 levels in control and GOT2 loss-of-function PDAC lines. **b**, Viable cell measurements in the indicated PDAC lines. Data are presented as mean  $\pm$  s.e.m. from biological triplicates. **c**, Immunohistochemical staining of FC1245 tumors at experimental endpoint, representative of  $n = 3$  per cohort. Scale bar = 50  $\mu$ m. **d**, Immunohistochemical staining of 688M tumors at experimental endpoint, representative of  $n = 3-5$  per cohort, at low magnification to display tissue-wide staining patterns. Upper images: scale bar = 1 mm, lower images: scale bar = 500  $\mu$ m.

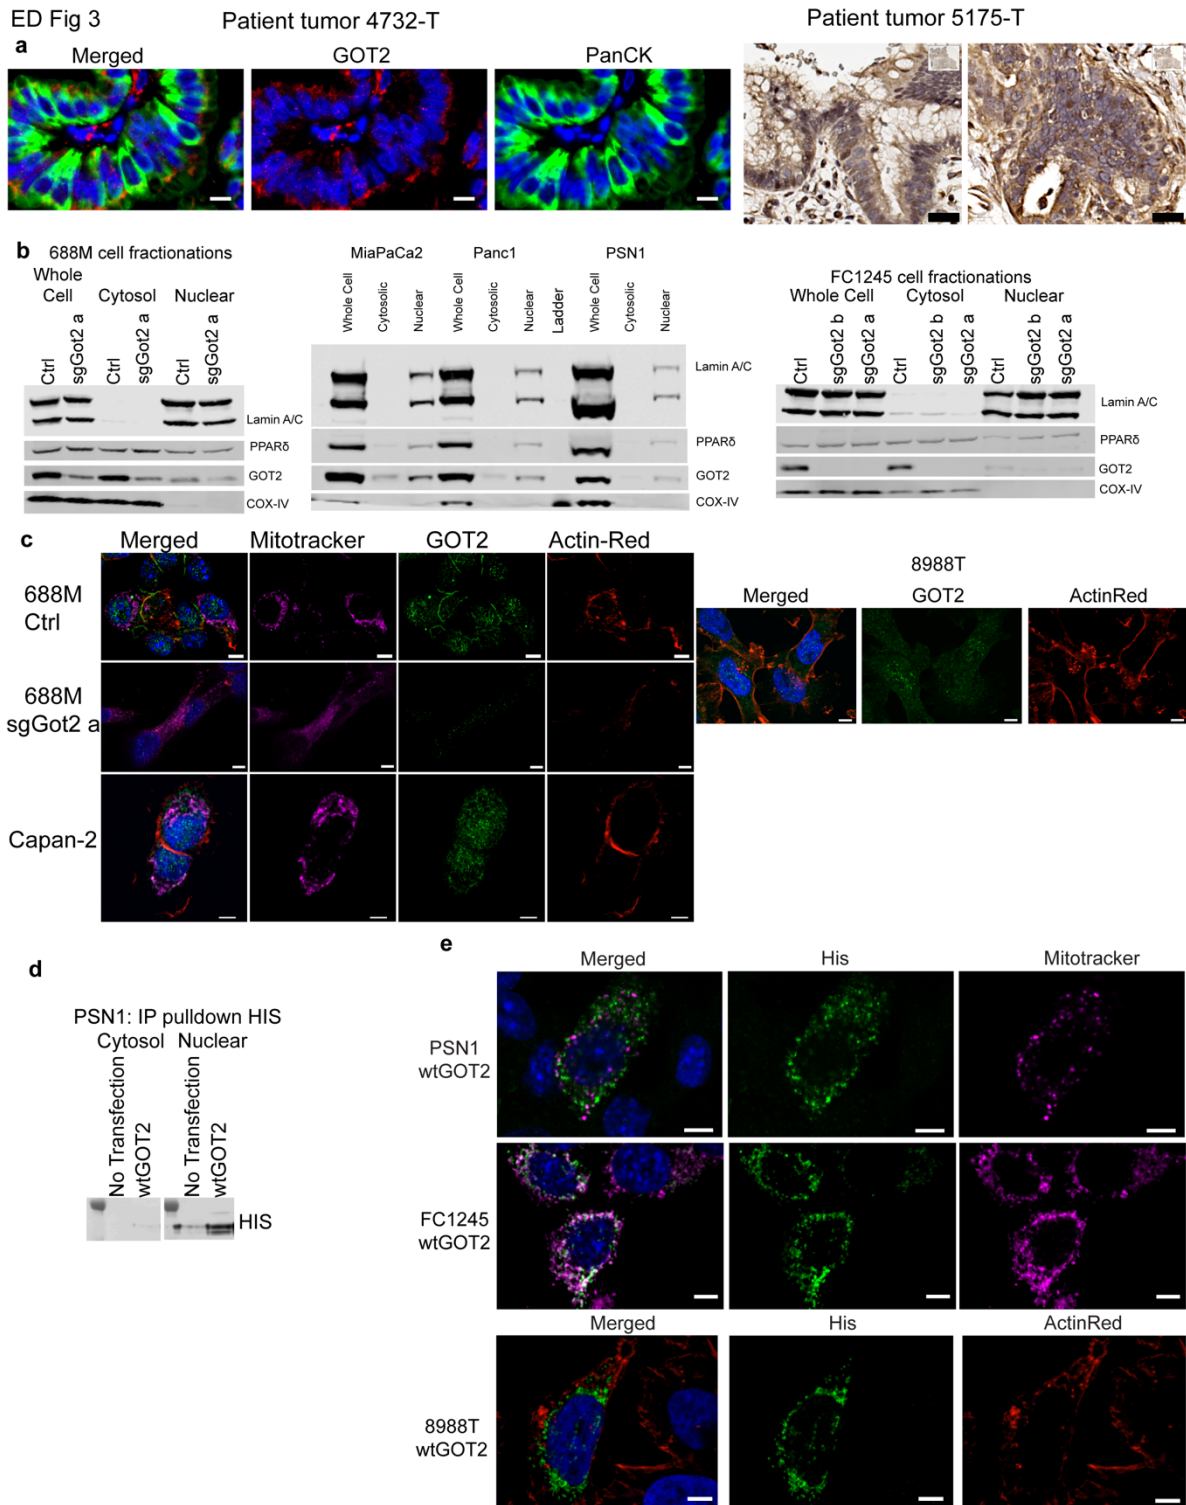

**Extended Data Figure 3: A pool of GOT2 protein localizes to the nucleus in PDAC cells.**

**a**, Immunohistochemical staining for GOT2 or GOT2 and panCK in human PDAC (representative of  $n = 5$ ), showing additional samples to complement Figure 3b. Fluorescent images: scale bar = 2  $\mu\text{m}$ , brightfield image: scale bar = 20  $\mu\text{m}$ . **b**, Western blots in PDAC cell lines indicating GOT2 protein levels in the indicated cellular fractions. Lamin A/C is a loading control for nuclei, COX-IV is a loading control for cytoplasm and indicates an absence of mitochondrial protein in the nuclear fraction. **c**, Immunofluorescent staining of the indicated PDAC cell lines for endogenous GOT2. Mitotracker indicates mitochondria, Actin-Red indicates F-actin, and nuclei are counterstained with DAPI. Scale bar = 5  $\mu\text{m}$ . **d**, Immunoprecipitation of transiently transfected, His-tagged GOT2 from the indicated cellular fractions in PSN-1 human PDAC cells. **e**, Immunofluorescent staining of the indicated PDAC cell lines for transiently transfected, His-tagged GOT2. Scale bar = 5  $\mu\text{m}$ .

ED Fig 4

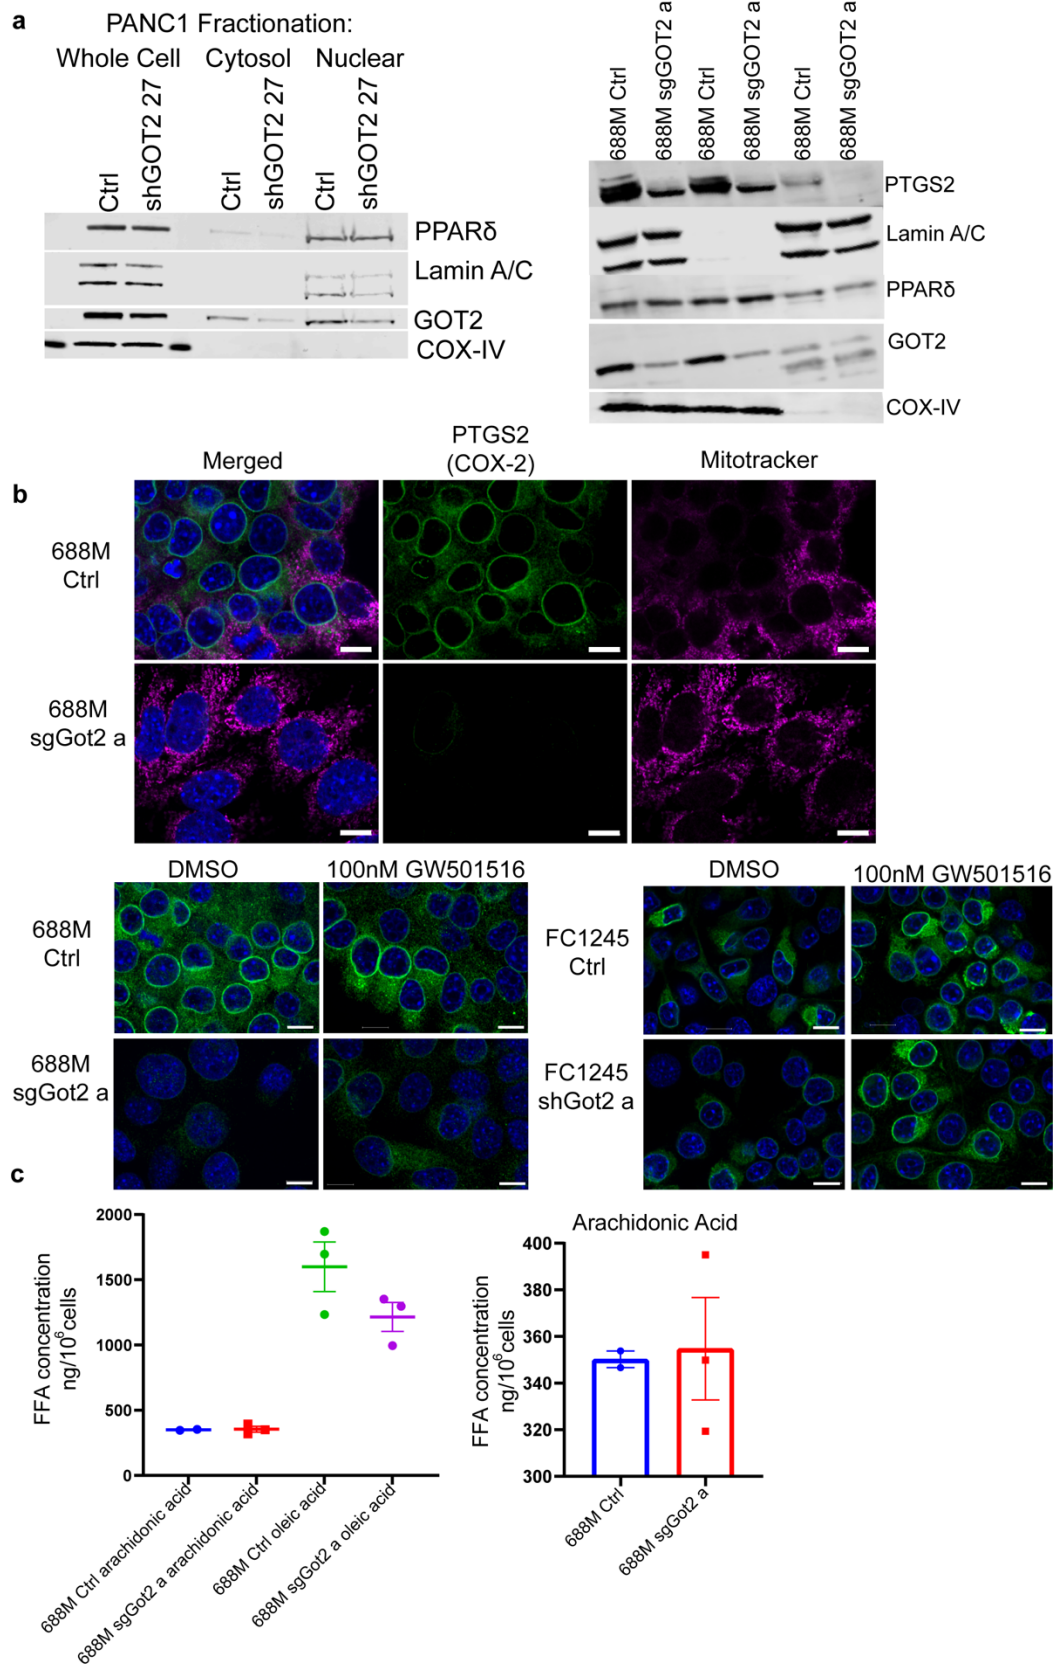

**Extended Data Figure 4: GOT2 positively regulates PPAR $\delta$  activity and target gene expression.**

**a**, Western blots indicating levels of GOT2, PPAR $\delta$ , and PPAR $\delta$  target PTGS2/COX2 in the indicated PDAC lines. **b**, Immunofluorescent staining of ctrl and sgGot2 688M cells, as well as ctrl and shGot2 FC1245 cells, for PTGS2/COX2 with or without 100 nM GW501516 treatment. Scale bar = 10  $\mu$ m. **c**, Quantification of fatty acid levels in ctrl and sgGot2 688M cells, measured in whole cells by LCMS.

ED Fig 5

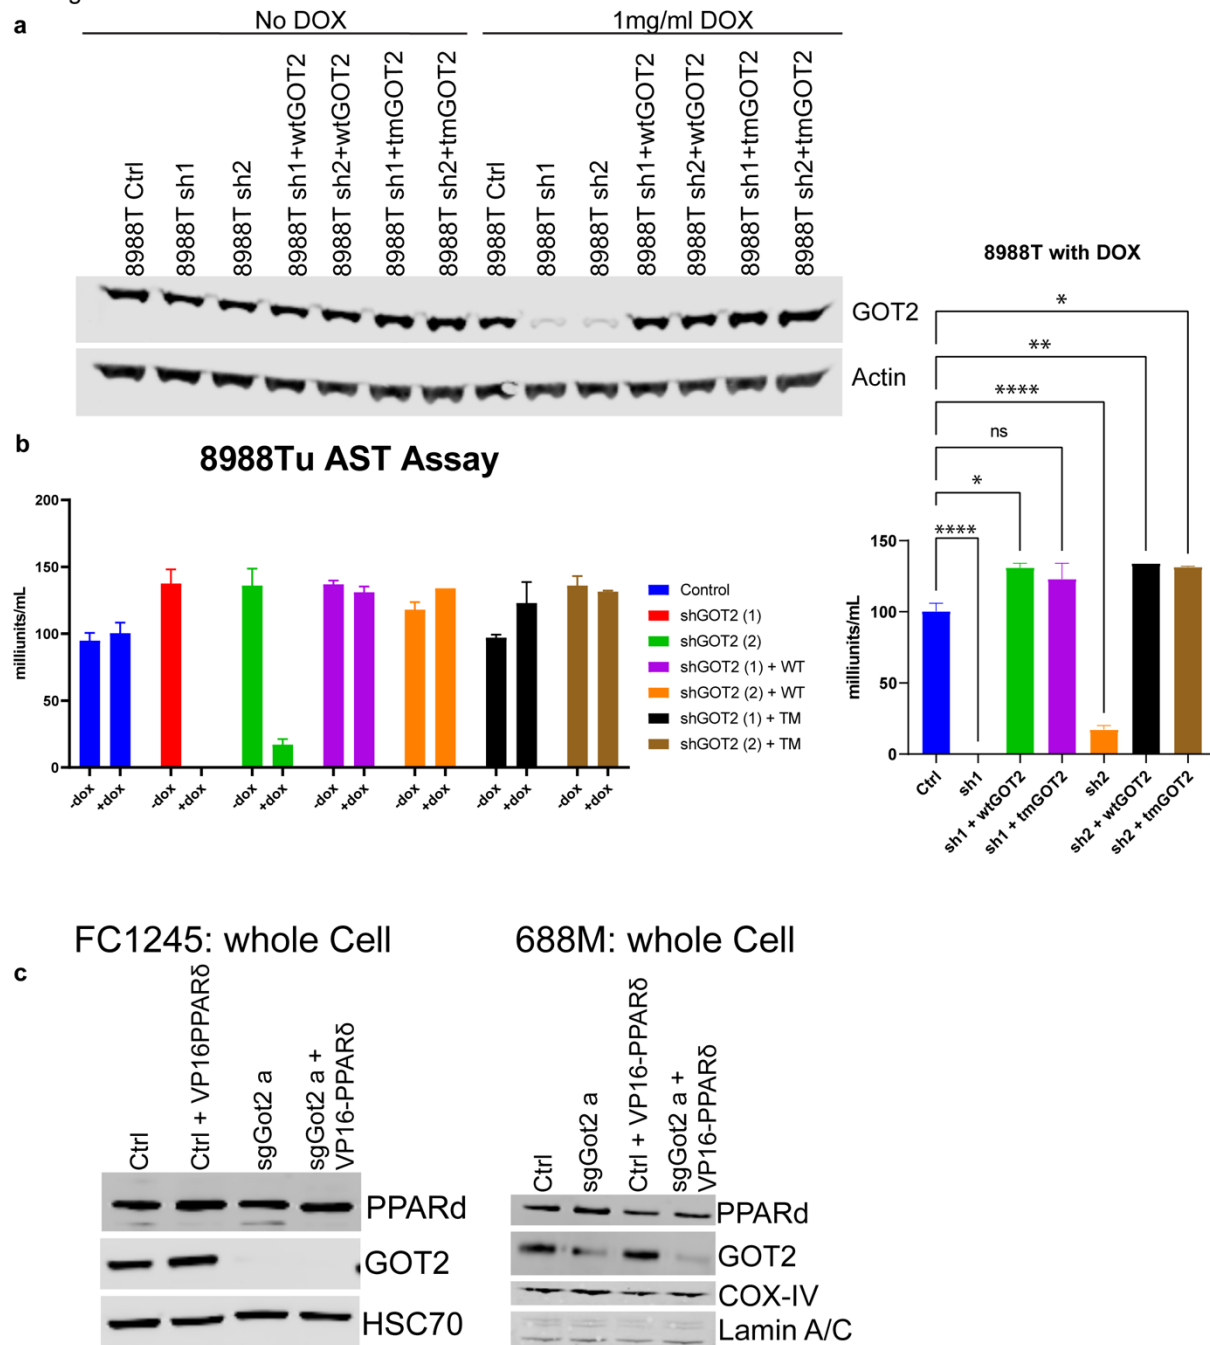

**Extended Data Figure 5: GOT2 fatty acid binding and PPARδ activation support tumor growth.**

**a**, Western blots indicating GOT2 levels in doxycycline-inducible GOT2 knockdown 8988T cells, reconstituted with wtGOT2 or tmGOT2. **b**, Aspartate aminotransferase activity assay (also known as glutamate-oxaloacetate transaminase activity assay) on the cells indicated in **a**. Data are plotted as mean  $\pm$  s.e.m. from biological triplicates. \* $p < 0.05$ , \*\* $p < 0.01$ , \*\*\*\* $p < 0.0001$  by one-way ANOVA. **c**, Western blots indicating GOT2 and PPARδ expression in the indicated stable cell lines.
